1 **TITLE**

2 **Hierarchical organization endows the kinase domain with regulatory**  
3 **plasticity**

4  
5 **AUTHORS**

6 Pau Creixell<sup>1,2,3</sup>, Jai P. Pandey<sup>4</sup>, Antonio Palmeri<sup>5</sup>, Marc C. Santa-Olalla<sup>1,2,3</sup>, Rama  
7 Ranganathan<sup>6</sup>, David Pincus<sup>4,\*</sup>, Michael B. Yaffe<sup>1,2,3,7,\*,#</sup>

8  
9 <sup>1</sup> Koch Institute for Integrative Cancer Research, Massachusetts Institute of Technology,  
10 Cambridge, USA

11 <sup>2</sup> Department of Biology, Massachusetts Institute of Technology, Cambridge, USA

12 <sup>3</sup> Department of Biological Engineering, Massachusetts Institute of Technology, Cambridge,  
13 USA

14 <sup>4</sup> Whitehead Institute for Biomedical Research, Cambridge, USA

15 <sup>5</sup> Present address: Celgene Institute for Translational Research Europe (CITRE), Seville, Spain

16 <sup>6</sup> Green Center for Systems Biology, Departments of Biophysics and Pharmacology, University  
17 of Texas Southwestern Medical School, Dallas, USA

18 <sup>7</sup> Divisions of Acute Care Surgery, Trauma, and Critical Care and Surgical Oncology,  
19 Department of Surgery, Beth Israel Deaconess Medical Center, Harvard Medical School,  
20 Boston, USA

21 \* Correspondence: [pincus@wi.mit.edu](mailto:pincus@wi.mit.edu), [myaffe@mit.edu](mailto:myaffe@mit.edu)

22 # [Lead author](#)

23

24 **ABSTRACT**

25 The functional diversity of kinases enables specificity in cellular signal transduction. Yet general  
26 rules for how the kinase domain allows the more than 500 members of the human kinome to  
27 receive specific regulatory inputs and convey information to appropriate substrates – all while  
28 using the common signaling currency of phosphorylation – remain enigmatic. Here, using co-  
29 evolution analysis and quantitative live-cell assays, we reveal a deep hierarchical organization  
30 of the kinase domain that facilitates the orthogonal evolution of regulatory inputs and substrate  
31 outputs while maintaining catalytic function. Three quasi-independent functional units in the  
32 kinase domain (known as protein sectors) encode for catalysis, substrate specificity and  
33 regulation, and these distinct subdomains are differentially exploited by somatic cancer  
34 mutations and harnessed by allosteric inhibitors. We propose that this functional architecture  
35 endows the kinase domain with inherent regulatory plasticity.

36

## 37 INTRODUCTION

38 The ability of cells to specifically respond to a wide variety of environmental cues is made  
39 possible by the capacity of signaling proteins to form both insulated and overlapping  
40 information-processing networks. Protein kinases are critical nodes in these networks due to  
41 their ability to transmit a major signaling currency – phosphorylation – that can modify the  
42 activity, localization, interactions, stability and other functions of their substrate proteins<sup>1-4</sup>. As  
43 such, kinases have diversified into more than 540 distinct proteins within the human proteome<sup>2</sup>.  
44 While by definition all kinases share the core function of phosphorylating substrates, the evident  
45 specificity of signaling pathways indicates that kinases have evolved divergent substrate  
46 recognition capabilities and regulatory mechanisms. How these evolving kinase domain family  
47 members accomplished the balancing act of maintaining catalytic function while accommodating  
48 a diverse range of novel substrates and regulatory inputs remains a mystery.

49  
50 Three features of protein kinases make solving this mystery particularly worthwhile. First, the  
51 kinase domain is the domain most often found encoded in cancer genes<sup>5</sup>. Second, there  
52 remains a major unmet need to develop allosteric drugs that perturb specific kinases. These  
53 drugs will have to take advantage of differences in substrate specificity and regulation rather  
54 than acting as ATP mimetics, which often results in off-target effects<sup>4,6,7</sup>. Finally, from a synthetic  
55 biology perspective, the kinase domain represents a highly plastic molecular machine that  
56 should be able to be programmed to dynamically convert a broad range of molecular inputs to a  
57 diverse array of orthogonal outputs<sup>8-10</sup>.

58  
59 Here, we sought to uncover the functional architecture of the kinase domain. To this end, we  
60 developed a computational approach, termed comparative coupling analysis (CCA), to define  
61 groups of co-evolving functional residues (protein sectors) in the kinase domain, both at the  
62 whole-kinome level and within well-defined kinase subgroups. CCA predicted the existence of

63 three quasi-independent sectors that encode distinct functions: catalysis, substrate specificity  
64 and regulation, which we validated via mutational analysis coupled to quantitative live cell  
65 measurements. We find that the three sectors display a hierarchy of conservation that  
66 corresponds to the functional plasticity that each sector demands. The most conserved sector  
67 encodes the fundamental catalytic function required by all kinases, while the sectors that  
68 encode substrate recognition and regulatory inputs show progressively less conservation and  
69 more subfamily specificity. The sectors are exploited both by cancer mutations and allosteric  
70 kinase inhibitors, thus underscoring their functional relevance. Our results indicate a hierarchical  
71 organization of the kinase domain by which substrate recognition and regulatory inputs can be  
72 readily altered over evolution and tuned by mutations and inhibitors.

73

## 74 **RESULTS**

### 75 **Three groups of co-evolving residues constitute distinct sectors within the kinase** 76 **domain**

77 To gain insight into the hard-wired functional organization of the kinase domain, we developed a  
78 novel computational approach as an extension of the statistical coupling analysis (SCA)<sup>11,12</sup>.  
79 SCA was originally designed to identify groups of amino acids known as protein sectors that  
80 coevolve to perform a specific molecular function<sup>11,12</sup>. Our method – termed comparative  
81 coupling analysis (CCA) – differs from SCA in that it uses information from protein family  
82 subgroups to predict similarities and differences in the sector-forming residues and the  
83 conserved and evolving functions the sectors encode (Figure 1A-C).

84

85 We applied both SCA and CCA to the kinase superfamily, which consists of seven canonical,  
86 well-defined subgroups classified on the basis of function, sequence and structural similarity,  
87 evolutionary history and substrate class (AGC, CAMK, CMGC, STE, CK1, TKL and TK)<sup>2</sup>.  
88 Sequences were obtained for 4867 kinases covering all seven kinase subgroups from fifteen

89 different species ranging from *Homo sapiens* to *Giardia*, and aligned using the alignment of  
90 human kinase domains as a reference (Table S1, see methods). SCA performed on the entire  
91 collection of aligned sequences identified five independent components in the kinase domain  
92 that collapse to three distinct sectors, herein referred to as the red, green and blue sectors  
93 (Figure 1B). CCA revealed that the three sectors identified in the kinome-wide alignment are all  
94 present in every kinase subgroup (Figure 1B). However, importantly, CCA revealed critical  
95 differences in the subsets of the residues that form the sectors and in the degree of  
96 conservation of the sectors among the seven different kinase subgroups (Figure 1B-C, Figure  
97 S1 and Table S2). Indeed, while the red sector is compositionally conserved, meaning that the  
98 same residues largely comprise the red sector in all subgroups, the green and blue sectors  
99 show progressively less compositional conservation (Figure 1C-D). To investigate potential  
100 evolutionary differences between the three protein sectors, we estimated the number of  
101 nonsynonymous substitutions that occurred in residues forming the different protein sectors  
102 (Figure 1E and methods)<sup>13</sup>. The significantly different number of nonsynonymous substitutions  
103 estimated for the three sectors suggests that they are distinct evolving units resulting from  
104 diverging evolutionary pressures.

105

### 106 **The red sector includes the conserved catalytic core of the kinase domain**

107 The red sector encompasses known kinase architectural determinants that are important for  
108 catalytic transfer of phosphate from ATP to a substrate hydroxyl group (Figure 2A and Figure  
109 S2). These determinants include glycine residues in the P-loop, the DFG and APE motifs that  
110 delimit the activation segment, the catalytic loop HRD motif and parts of the catalytic and  
111 regulatory spines<sup>1-3,14,15</sup> in addition to other residues that co-evolve with them and whose direct  
112 contribution to catalytic function has been less well recognized. Indeed, consistent with the core  
113 function of this sector, we observed a direct correlation between primary sequence conservation  
114 of a given residue and its contribution to the red sector (Pearson's correlation of 0.79, Figure

115 2B); a direct correlation that was not present for other sectors (Figure S2). The observation that  
116 specific core residues involved in catalysis were contained in the red sector, however, was  
117 perplexing, since strictly conserved residues that do not show co-variation with other amino  
118 acids should be invisible upon SCA and CCA analysis. Therefore, to clarify this and identify  
119 which specific kinases drove the identification of this sector, singular value decomposition (SVD)  
120 was performed. SVD analysis revealed a group of known catalytically-impaired pseudo-  
121 kinases<sup>16</sup> as those that presented sequence variations in the red sector (Figure 2C). Taken  
122 together, these results suggest that the red sector represents coupled residues that delineate  
123 the deeply conserved catalytic core of the kinase domain.

124

### 125 **Green sector composition determines substrate specificity**

126 The green sector displays intermediate compositional conservation (Figure 1D). The green  
127 sector is formed by residues that line and bracket the substrate binding site, and includes known  
128 determinants of substrate specificity such as the P+1 loop and residues downstream of the HRD  
129 motif near the catalytic loop (Figure 3A)<sup>1,3,17</sup>. Indeed, in several kinase-substrate co-crystal  
130 structures, the green sector is the sector that makes the largest amount of direct substrate  
131 contact, as illustrated by the structure of AKT/PKB in complex with GSK3 (Figure 3B) and the  
132 structure of PKA in complex with PKI (Figure S3). Further supporting a role in substrate  
133 recognition and specificity, SVD revealed that the three independent components that make up  
134 the green sector broadly separate kinases on the basis of their substrate specificity: tyrosine  
135 kinases (TKs) are clearly separated from the rest of the kinome, which is comprised of  
136 serine/threonine and dual-specificity kinases (Figure 2C, 3C). Moreover, SVD organized the  
137 non-TK kinome along a substrate specificity gradient, ranging from the proline-directed CMGC  
138 kinases toward basophilic-directed CAMK and AGC kinases (Figure 3C, upper right and lower  
139 left, respectively). As an orthogonal approach, we compared the KINspect score<sup>17</sup> – an  
140 established metric to quantify the likelihood that a residue has a role in substrate specificity – for

141 each green sector residue across the kinase domain to the score for all non-green sector  
142 residues. Green sector residues showed a significantly higher KINspect score than non-green  
143 sector residues (Mann Whitney U,  $p = 0.005$ , Figure 3D). Taken together, these results suggest  
144 that the green sector is composed of coupled residues with functional roles in substrate  
145 recognition and specificity.

146

### 147 **The blue sector is poised to receive regulatory inputs**

148 The most highly divergent sector between subgroups, the blue sector, appears to connect the  
149 active site and residues in the red and green sectors with more peripheral sites at the surface of  
150 the kinase domain (Figure 4A). This topology naturally suggests a role in transmitting regulatory  
151 inputs. Indeed, we found clear examples where regulatory interactions occur preferentially with  
152 blue sector sites, such as an allosteric binding site on the yeast MAPK Fus3 for the scaffold  
153 protein Ste5 (Figure 4A-C) or the binding site on CDK2 for cyclin A (Figure S4). Taken together,  
154 this architectural and anecdotal evidence suggests that the blue sector is well poised to receive  
155 regulatory inputs; a hypothesis that we subsequently tested experimentally.

156

### 157 **Mutational analysis validates the functionality of the blue sector**

158 To investigate the functionality of the blue sector experimentally, we performed a  
159 comprehensive mutational analysis on Fus3 and employed quantitative activity assays in live  
160 cells. Fus3 is specifically activated in response to mating pheromone ( $\alpha$  factor) and coordinates  
161 cell cycle arrest with the transcriptional and morphological responses required for mating<sup>18–20</sup>.  
162 We alanine scanned all 49 residues comprising the blue sector along with 49 non-sector  
163 positions evenly distributed along the Fus3 primary sequence. We genetically integrated each of  
164 these mutants as the only copy of Fus3 in the genome and assayed for Fus3 activity in  
165 response to different concentrations of  $\alpha$  factor using a fluorescent reporter of the mating  
166 pathway (Figure 4C). In our strain background, reporter output depends strictly on Fus3, and

167 wild type Fus3 (WT) produces a graded  $\alpha$  factor dose response (Figure 4C). In this assay, 3/49  
168 non-sector mutants were distinguishable from WT (1 loss-of-function (LoF) and 2 gain-of-  
169 function (GoF) phenotypes) (Figure 4D), as defined by being statistically different in at least two  
170 doses of mating pheromone. By contrast, 20/49 of the blue sector mutants had altered activity  
171 compared to WT (17 LoF, 3 GoF), revealing a significant enrichment of functional sites in the  
172 blue sector (Fisher's test,  $p = 2.09E-8$ , Figure 4D, E).

173

### 174 **Blue sector mutants phenocopy disrupted allosteric regulation**

175 The functionality of the blue sector suggests that it may be a conduit for regulatory inputs. If  
176 natural regulatory interactions evolved to exploit the blue sector, then specific blue sector  
177 mutations should phenocopy the disruption of cognate regulation. To test this, we repurposed  
178 our GoF Fus3 mutants and performed additional functional assays. In addition to being  
179 regulated by its upstream MAPKK through canonical activation loop phosphorylation, Fus3 is  
180 regulated allosterically – both positively and negatively – by the scaffold protein Ste5<sup>18-21</sup>. These  
181 dual modes of allosteric regulation allow the cell to simultaneously achieve a graded  
182 transcriptional response and a switch-like morphological response as a function of  $\alpha$  factor  
183 concentration (Figure 4C). The feedback domain (FBD) on Ste5 mediates the negative  
184 regulation of Fus3 required for the switch-like morphological transition that leads to formation of  
185 the mating projection, or “shmoo”<sup>21</sup>. As such, disruption of the FBD results in graded shmooing  
186 across a dose response of  $\alpha$  factor (Figure 4F)<sup>21</sup>. We hypothesized that some of the GoF Fus3  
187 blue sector mutants may have lost the ability to be negatively regulated by Ste5. Consistent with  
188 this idea, while both of the non-sector GoF mutants retained switch-like shmoo responses, 2/3  
189 of the blue sector GoF mutants showed graded shmooing (Figure 4F, G). Thus, mutation of blue  
190 sector residues recapitulated a phenotype associated with impaired allosteric regulation.

191

### 192 **CCA reveals private (subgroup-specific) sector residues**



193 CCA not only validated the presence of the red, green and blue sectors in each of the kinase  
194 subgroups, it also indicated that there are potentially important differences in the composition of  
195 the protein sector among the subgroups. In other words, whereas some sector sites are shared  
196 by several or all kinase subgroups, others are subgroup-specific (Figure 1C). We hypothesized  
197 that these subgroup-specific sector residues, or “private” sites, would be enriched for  
198 functionality in members of the subgroup in question but not in out-groups. To test this, we first  
199 identified AGC and CMGC kinases as the two subgroups predicted to be the most functionally  
200 divergent (Figure 5A and S5). SVD revealed that the dissimilarity between AGC and CMGC  
201 sector composition was largely driven by eight AGC-specific private sector sites that are non-  
202 sector sites in CMGC kinases (Figure 5B).

203

204 To experimentally test these AGC-specific sites, we performed mutational analysis on Pkc1, an  
205 essential AGC kinase in yeast (homolog of protein kinase C) required for cell wall integrity, and  
206 on Hog1, a CMGC kinase (yeast homolog of p38) required for adaptation to hyper-osmotic  
207 stress (Figure 5C). Mutation of 4/8 private AGC sector sites on Pkc1 resulted in phenotypic  
208 differences compared to wild type: two of the sites were essential for viability while two others  
209 altered levels of a fluorescent reporter upon exposure to the cell wall stressor zymolyase (Figure  
210 5D). In contrast to Pkc1, Hog1 tolerated mutations at all 8 AGC-specific sector sites without  
211 altered induction of a fluorescent reporter upon addition of sorbitol (Figure 5D). By contrast,  
212 Hog1 cannot tolerate a red sector mutation (Figure 5D). Importantly, despite failing to  
213 complement for loss of wild type Pkc1, the two inviable mutant proteins were expressed to wild  
214 type levels and properly localized when co-expressed with wild type Pkc1 (Figure 5E). These  
215 results demonstrate that the private AGC sector residues are specifically and significantly  
216 enriched for functionality in an AGC kinase (Fisher’s test,  $p = 0.038$ ), validating the CCA  
217 predictions (Figure 5F).

218

219 **Cancer mutations and allosteric inhibitor sites preferentially map onto distinct kinase**  
220 **sectors**

221 Finally, we assessed the relevance of kinase sectors to human disease (Figure 6). Since  
222 kinases are key targets of cancer mutations and therapeutic inhibitors<sup>4</sup>, we cross-referenced the  
223 sector positions against known somatic cancer mutations (Table S3). After mapping 1,515,599  
224 cancer somatic mutations onto canonical proteins, of which 14,860 mapped onto 13,152 sites  
225 within kinase domains, we observed a significant enrichment for cancer mutations at red sector  
226 sites (Wilcoxon test,  $p = 2.4E-4$ , Figure 6B and methods section). Given that red sector residues  
227 comprise the catalytic core of the kinase domain and would thus be predicted to impair  
228 catalysis, we were surprised to discover red sector mutations not only in tumor suppressors, but  
229 also in kinase oncogenes such as B-Raf and EGFR (Figure 6C, D). Importantly, in addition to  
230 mutations involving residues with well-established functions in catalysis (i.e. the DFG motif and  
231 Gly-rich loop), this mapping of cancer-associated mutations onto the red sector positions  
232 indicates potentially important roles for additional residues that have not been previously  
233 implicated in catalytic function. Moreover, in addition to these red sector somatic mutations, we  
234 found that allosteric inhibitors of Abl bind at blue sector surface positions, underscoring the  
235 regulatory function of the blue sector (Figure 6E). Thus, distinct kinase sectors seem to be  
236 exploited by mutations that promote cancer and by small molecule allosteric inhibitors used to  
237 control it.

238

239 **DISCUSSION**

240 The discovery of distinctly folded domains in proteins led to the interpretation that domains  
241 represent units of evolution and function<sup>22,23</sup>. However, it has become clear that there is a large  
242 degree of functional and evolutionary heterogeneity among the residues that form a domain.  
243 Here we found that the kinase domain is organized in a functional hierarchy that allows a deeply  
244 conserved catalytic function to be differentially deployed over evolution to act on distinct sets of

245 substrates and respond to specific regulatory inputs. By formally defining sets of residues likely  
246 to encode each of these molecular functionalities using CCA, it becomes tractable to study how  
247 these functions may have evolved, or are perturbed in diseases such as cancer (Figures 6).

248

249 The residues contributing to the catalytic core of the kinase domain – the red sector sites – are  
250 limited in their ability to evolve due to their fundamental importance. Consequently, the red  
251 sector is characterized by a high degree of residue conservation and a resulting low degree of  
252 evolution. By contrast, the green sector is formed by residues involved in the recognition of the  
253 substrate peptide, a molecular function that must – and indeed does – allow plasticity between  
254 kinase subgroups to accommodate varied substrates. Finally, the blue sector presents the  
255 widest degree of plasticity and divergence between kinase groups, consistent with different  
256 kinases evolving divergent regulatory mechanisms. Accordingly, disease mutations can  
257 inactivate a kinase via the red sector, but perhaps more sinisterly, could alter substrate  
258 specificity or regulatory inputs to subvert and reroute signaling.

259

260 There are two notable exceptions to the rule that the red sector is invariant. First, tyrosine  
261 kinases represent a functionally divergent subgroup, at least in part driven by their capacity to  
262 phosphorylate tyrosine residues instead of serine and/or threonine residues. While the red  
263 sector appears to be well defined and compact in all other kinase subgroups, tyrosine kinases  
264 present large divergence in all sectors including the red sector. Second, pseudo-kinases also  
265 show divergence in the red sector where they have accumulated mutations leading to their  
266 impaired catalytic ability. Thus, these exceptions can be easily interpreted and ultimately serve  
267 to further support the notion that the red sector drives catalysis.

268

269 Beyond the red sector, CCA highlights the functional and regulatory plasticity present in different  
270 protein kinases by revealing the variability in the blue sector among the kinase subgroups. At

271 the same time, while CCA allows for this more granular understanding of the architecture of the  
272 kinase domain by incorporating subgroup-level information, the *in-silico* identification of  
273 functions that are idiosyncratic to individual kinases remains a significant challenge. This  
274 limitation arises from the need to capture enough sequences of sufficient diversity. Ultimately,  
275 the specific regulatory sites and interactions that control an individual kinase will need to be  
276 resolved using focused structural, biochemical and molecular genetic approaches. Despite this  
277 caveat, our *in vivo* mutagenesis and functional screens suggest that quantitative experiments  
278 performed on a specific protein kinase can recapitulate the functional principles predicted *in*  
279 *silico* at the subgroup-level. After validating the function of these sectors orthogonally, our  
280 models provide a means to identify trends and hypothesize mechanisms of action for disease-  
281 associated mutations or kinase inhibitors, which can be further tested in focused experiments  
282 subsequently.

283

284 Our current models still limit the possibility of individual residues performing multiple,  
285 overlapping molecular functions. To facilitate interpretation and subsequent analysis, we forced  
286 residues to have membership in only a single sector (e.g., residues defined as part of the red  
287 sector cannot be simultaneously considered as residues in the green sector). In nature, it is  
288 conceivable that a critical residue may play overlapping roles in catalysis, substrate specificity  
289 and/or kinase regulation. Similarly, while we define the three sectors as separate entities, there  
290 are clear differences in how related to one another the different sectors are. In particular, the  
291 blue sector – which connects putative allosteric sites on the kinase surface to the red and green  
292 sectors and the active site – includes residues that interface with the other sectors and may  
293 contribute to all three functionalities.

294

295 The formal, data-driven definition of functional residues presented here enables us to predict the  
296 functionality of cancer-associated mutations. We observed enrichment in the number of

297 mutations that perturb red sector sites – not only in tumor-suppressor kinases but also in  
298 oncogenes (Figure 6C, D). While initially counterintuitive, this finding suggests that there may be  
299 more examples of inactivating mutations leading to roles in trans-activation as has been  
300 reported for certain B-Raf mutations<sup>24–27</sup>. Finally, it is exciting to consider that the blue sector  
301 residues that we have implicated in kinase regulation appear to serve as portals for allosteric  
302 inhibitors (Figure 6E). Targeting blue sector surface sites may lead to the development of next-  
303 generation allosteric modulators.

304

## 305 REFERENCES

306

- 307 1. Hanks, S. & Hunter, T. Protein kinases 6. The eukaryotic protein kinase superfamily:  
308 kinase (catalytic) domain structure and classification. *The FASEB Journal* **9**, 576–596  
309 (1995).
- 310 2. Manning, G., Whyte, D. B., Martinez, R., Hunter, T. & Sudarsanam, S. The Protein  
311 Kinase Complement of the Human Genome. *Science* **298**, 1912–1934 (2002).
- 312 3. Nolen, B., Taylor, S. & Ghosh, G. Regulation of Protein Kinases: Controlling Activity  
313 through Activation Segment Conformation. *Molecular Cell* **15**, 661–675 (2004).
- 314 4. Fleuren, E. D. G., Zhang, L., Wu, J. & Daly, R. J. The kinome ‘at large’ in cancer. *Nat.*  
315 *Rev. Cancer* **16**, 83–98 (2016).
- 316 5. Greenman, C. *et al.* Patterns of somatic mutation in human cancer genomes. *Nature* **446**,  
317 153–158 (2007).
- 318 6. Davis, M. I. *et al.* Comprehensive analysis of kinase inhibitor selectivity. *Nat Biotechnol*  
319 **29**, 1046–1051 (2011).
- 320 7. Anastassiadis, T., Deacon, S. W., Devarajan, K., Ma, H. & Peterson, J. R.  
321 Comprehensive assay of kinase catalytic activity reveals features of kinase inhibitor  
322 selectivity. *Nat Biotechnol* **29**, 1039–1045 (2011).

- 323 8. Brunet, a & Pouysségur, J. Identification of MAP kinase domains by redirecting stress  
324 signals into growth factor responses. *Science* **272**, 1652–1655 (1996).
- 325 9. Roybal, K. T. *et al.* Precision Tumor Recognition by T Cells with Combinatorial Antigen-  
326 Sensing Circuits. *Cell* **164**, 770–779 (2016).
- 327 10. Morsut, L. *et al.* Engineering Customized Cell Sensing and Response Behaviors Using  
328 Synthetic Notch Receptors. *Cell* **164**, 780–791 (2016).
- 329 11. Halabi, N., Rivoire, O., Leibler, S. & Ranganathan, R. Protein Sectors: Evolutionary Units  
330 of Three-Dimensional Structure. *Cell* **138**, 774–786 (2009).
- 331 12. Rivoire, O., Reynolds, K. A. & Ranganathan, R. Evolution-Based Functional  
332 Decomposition of Proteins. *PLoS Comput. Biol.* **12**, (2016).
- 333 13. Yang, Z. & Nielsen, R. Estimating Synonymous and Nonsynonymous Substitution Rates  
334 Under Realistic Evolutionary Models. *Mol. Biol. Evol.* **17**, 32–43 (2000).
- 335 14. Kornev, A. P., Haste, N. M., Taylor, S. S. & Eyck, L. F. Surface comparison of active and  
336 inactive protein kinases identifies a conserved activation mechanism. *Proc Natl Acad Sci*  
337 *U S A* **103**, 17783–17788 (2006).
- 338 15. Kornev, A. P., Taylor, S. S. & Ten Eyck, L. F. A helix scaffold for the assembly of active  
339 protein kinases. *Proc Natl Acad Sci U S A* **105**, 14377–14382 (2008).
- 340 16. Zeqiraj, E. & van Aalten, D. M. Pseudokinases-remnants of evolution or key allosteric  
341 regulators? *Curr Opin Struct Biol* **20**, 772–781 (2010).
- 342 17. Creixell, P. *et al.* Unmasking Determinants of Specificity in the Human Kinome. *Cell* **163**,  
343 187–201 (2015).
- 344 18. Malleshaiah, M. K., Shahrezaei, V., Swain, P. S. & Michnick, S. W. The scaffold protein  
345 Ste5 directly controls a switch-like mating decision in yeast. *Nature* **465**, 101–105 (2010).
- 346 19. Bhattacharyya, R. P. *et al.* The Ste5 scaffold allosterically modulates signaling output of  
347 the yeast mating pathway. *Science* **311**, 822–826 (2006).
- 348 20. Good, M., Tang, G., Singleton, J., Rem??nyi, A. & Lim, W. A. The Ste5 Scaffold Directs

- 349 Mating Signaling by Catalytically Unlocking the Fus3 MAP Kinase for Activation. *Cell* **136**,  
350 1085–1097 (2009).
- 351 21. Coyle, S. M., Flores, J. & Lim, W. A. Exploitation of latent allostery enables the evolution  
352 of new modes of MAP kinase regulation. *Cell* **154**, 875–887 (2013).
- 353 22. Wetlaufer, D. B. Nucleation, Rapid Folding, and Globular Intrachain Regions in Proteins.  
354 *Proc. Natl. Acad. Sci.* **70**, 697–701 (1973).
- 355 23. Bork, P. Shuffled domains in extracellular proteins. *FEBS Lett.* **286**, 47–54 (1991).
- 356 24. Nieto, P. *et al.* A Braf kinase-inactive mutant induces lung adenocarcinoma. *Nature* **548**,  
357 239–243 (2017).
- 358 25. Yao, Z. *et al.* Tumours with class 3 BRAF mutants are sensitive to the inhibition of  
359 activated RAS. *Nature* **548**, 234–238 (2017).
- 360 26. Wan, P. T. C. *et al.* Mechanism of Activation of the RAF-ERK Signaling Pathway by  
361 Oncogenic Mutations of B-RAF. *Cell* **116**, 855–867 (2004).
- 362 27. Haling, J. R. *et al.* Structure of the BRAF-MEK Complex Reveals a Kinase Activity  
363 Independent Role for BRAF in MAPK Signaling. *Cancer Cell* **26**, 402–413 (2014).
- 364 28. Henikoff, S. & Henikoff, J. G. Amino acid substitution matrices from protein blocks. *Proc*  
365 *Natl Acad Sci U S A* **89**, 10915–10919 (1992).
- 366 29. Forbes, S. A. *et al.* COSMIC: mining complete cancer genomes in the Catalogue of  
367 Somatic Mutations in Cancer. *Nucleic Acids Res* **39**, D945-50 (2011).
- 368 30. Chaikuad, A. *et al.* A unique inhibitor binding site in ERK1/2 is associated with slow  
369 binding kinetics. *Nat. Chem. Biol.* **10**, 853–860 (2014).
- 370 31. Zheng, J. *et al.* 2.2 Å refined crystal structure of the catalytic subunit of cAMP-dependent  
371 protein kinase complexed with MnATP and a peptide inhibitor. *Acta Crystallogr. Sect. D*  
372 *Biol. Crystallogr.* **49**, 362–365 (1993).
- 373 32. Pettersen, E. F. *et al.* UCSF Chimera--a visualization system for exploratory research and  
374 analysis. *J Comput Chem* **25**, 1605–1612 (2004).

- 375 33. Katoh, K. & Frith, M. C. Adding unaligned sequences into an existing alignment using  
376 MAFFT and LAST. *Bioinformatics* **28**, 3144–3146 (2012).
- 377 34. Lee, S. J. *et al.* Crystal Structure of Pim1 Kinase in Complex with a Pyrido[4,3-  
378 D]Pyrimidine Derivative Suggests a Unique Binding Mode. *PLoS One* **8**, (2013).
- 379 35. Xue, Y. *et al.* X-ray structural analysis of tau-tubulin kinase 1 and its interactions with  
380 small molecular inhibitors. *ChemMedChem* **8**, 1846–1854 (2013).
- 381 36. Chaikuad, A. *et al.* A unique inhibitor binding site in ERK1/2 is associated with slow  
382 binding kinetics. *Nat Chem Biol* **10**, 853–860 (2014).
- 383 37. Ni, L. *et al.* Structural basis for autoactivation of human Mst2 kinase and its regulation by  
384 RASSF5. *Structure* **21**, 1757–1768 (2013).
- 385 38. Newhouse, B. J. *et al.* Imidazo[4,5-b]pyridine inhibitors of B-Raf kinase. *Bioorganic Med.*  
386 *Chem. Lett.* **23**, 5896–5899 (2013).
- 387 39. Schindler, T. Structural Mechanism for STI-571 Inhibition of Abelson Tyrosine Kinase.  
388 *Science (80-. )*. **289**, 1938–1942 (2000).
- 389 40. Yang, Z. PAML 4: Phylogenetic analysis by maximum likelihood. *Mol. Biol. Evol.* **24**,  
390 1586–1591 (2007).
- 391 41. McLaren, W. *et al.* The Ensembl Variant Effect Predictor. *Genome Biol.* **17**, 122 (2016).
- 392 42. Longtine, M. S. *et al.* Additional modules for versatile and economical PCR-based gene  
393 deletion and modification in *Saccharomyces cerevisiae*. *Yeast* **14**, 953–961 (1998).

394



395 **ACKNOWLEDGEMENTS**

396 We would like to thank Brian A. Joughin, Daniel Lim and all other members of the Yaffe for  
397 discussion and critical input leading to this work. We are grateful to Z. Feder and J. Krakowiak  
398 for technical assistance, and to the Whitehead Institute FACS facility and the Keck Microscopy  
399 facility. This work was supported by a Merck Postdoctoral Fellowship from the Helen Hay  
400 Whitney Foundation (to P.C.), an NIH Early Independence Award (DP5 OD017941-01 to D.P.),  
401 NIH grants GM104047 and ES015339 (to M.B.Y.), and the Charles and Marjorie Holloway  
402 Foundation (M.B.Y.).

403

404 **AUTHOR CONTRIBUTIONS**

405 Conceptualization, P.C., D.P., R.R., and M.B.Y.; Methodology, P.C., D.P., and M.B.Y.;  
406 Investigation, P.C., J.P.P, D.P., A.P., M.C.S.; Writing P.C., D.P. and M.B.Y. with input from all  
407 authors; Supervision, P.C., D.P. and M.B.Y.

408

409

410 **FIGURE LEGENDS**

411 **Figure 1. Comparative coupling analysis of the kinase domain.**

412 A – Conceptual representation of amino acid residues driving specific molecular functions

413 allows the distinction between those residues involved in “*core*” functions (such as  
414 catalysis, shown in red), which will be highly conserved in all instances of that domain,  
415 and those residues involved in “*complementary*” functions (like regulation, shown in blue),  
416 with higher freedom to evolve.

417 B – Left: In Statistical Coupling Analysis (SCA) of protein kinases, a superfamily-wide domain

418 alignment from a single species is used to calculate coupling between every pair of  
419 residues and every pair of positions in the alignment. The resulting high-dimensional  
420 matrix is further compressed into a two-dimensional coupling matrix, where the value at  
421 every position represents the degree of coupling between every pair of positions in the  
422 domain. From this coupling matrix, significantly coupled residues are identified by  
423 spectral decomposition and comparison to a randomized alignment in which residues are  
424 randomly reshuffled at each position in the alignment, thereby maintaining conservation  
425 while losing coupling. Next, independent component analysis (ICA) allows the  
426 identification of “independent components” (ICs) or clusters of residues that are more  
427 coupled amongst themselves than with the other residues. Finally, in cases where  
428 significant coupling still exists between several “independent components”, they are  
429 considered part of the same protein sector (see Methods). Right: Unlike SCA, where  
430 kinases from all groups are considered at once, for Comparative Coupling Analysis  
431 (CCA) subgroup-specific alignments are performed using orthologs from 15 divergent  
432 genomes where each of the seven classically defined protein kinase subgroups<sup>2</sup> (TK,  
433 TKL, CK1, CMGC, STE, CAMK and AGC) is considered individually. This subgroup-  
434 specific analysis typically identifies both a larger number and a distinct set of coupled  
435 residues as shown for AGC and CMGC.. A full representation of all CCA results for the

436 each of the different kinase subgroups is shown in supplemental figure S1.

437 C – Representation of a fraction of all coupled residues within the kinase domain colored by  
438 their independent component and sector membership in the different groups ordered by  
439 primary sequence (left) or by sector membership after clustering (right). For a full  
440 representation of all coupled residues, see supplemental figure S1.

441 D – Quantification of compositional conservation for the different sectors as measured by the  
442 median number of other kinase subgroups for which a red sector residue (or green or  
443 blue) is also red (or green or blue).

444 E – Estimation of the degree of negative selection for the different protein sectors identified  
445 within the kinase domain by calculating omega estimates corresponding to the number of  
446 synonymous and nonsynonymous substitutions for the different residues, while correcting  
447 for multiple substitutions, transition/transversion rate biases and base/codon frequency  
448 biases<sup>13</sup> (see Methods).

449

450 **Figure 2. The red sectors drives catalysis.**

451 A – Depiction of residues contained within the red sector, illustrated on the structure of ERK2  
452 (PDB: 4QTE). Residues that have been previously established as critical components of  
453 the catalytic core of the kinase domain are indicated.

454 B – Comparison between the contribution of every residue within the kinase domain to the first  
455 independent component (the one constituting the red sector) and the degree of overall  
456 conservation of that same residue. Residue conservation is measured using the Kullback-  
457 Leibler relative entropy,  $D_i$  (see Methods).

458 C – Scatterplot positioning protein kinases according to their sequence variation along the first  
459 and second independent components, as described in Figure 1B. The group of pseudo-  
460 kinases, which form the majority of kinases diverging along the first independent  
461 component (the red sector), are shown in filled black circles. Notably, the second

462 independent component, part of the green sector, separates the tyrosine kinases (TKs).

463

464 **Figure 3. The green sectors encodes substrate peptide specificity.**

465 A – Illustration of residues contained within the green sector, superimposed on the structure of  
466 PKB/AKT in complex with a GSK3 peptide substrate with sequence GRPRTTSFAE  
467 (PDB: 4EKK). Regions previously implicated as key determinants of substrate specificity  
468 are indicated.

469 B – Barplot comparing the surface area of red, green and blue sector residues that is buried by  
470 the peptide substrate in the structure of the PKB/AKT:GSK3 substrate peptide complex,  
471 shown in panel A. For this calculation, the solvent exposure of all residues is calculated in  
472 the presence and absence of the peptide substrate and the differential exposure for the  
473 different sector residues is displayed.

474 C – Scatterplot of sequence variation between all human kinases, relative to one another, of  
475 residues that form the second, third and fourth independent components as described in  
476 Figure 1B. Each point indicates a particular kinase and is colored according to its major  
477 kinase group.

478 D – Violin plot of the distribution of KINSpect scores, an orthogonal measure of the contribution  
479 of each residue within the kinase domain towards substrate specificity<sup>17</sup>, for residues  
480 belonging to the green sector compared to residues outside the green sector. The width  
481 of the violin at any particular KINSpect score indicates the number of residues that match  
482 that score.

483

484 **Figure 4. Mutational analysis of Fus3 reveals a functionality for the blue sector in**  
485 **mediating regulatory inputs.**

486 A – Illustration of residues forming the blue sector, superimposed on the structure of the yeast  
487 MAP kinase Fus3 in complex with the Fus3-Binding Domain (FDB) domain of Ste5

488 colored in orange (PDB: 2JED).

489 B – Barplot displaying the differential solvent exposed area surfaces for red, green and blue  
490 sector sites in Fus3 in the presence or absence of the Fus3-Binding Domain (FBD) of  
491 Ste5, as described in the caption of figure 3B.

492 C – Schema of the yeast mating pathway including the role of Fus3 and its allosteric regulation  
493 by Ste5-FBD to maintain the pathway in an inactive state. The downstream transcriptional  
494 reporter used in the functional assays for Fus3 activity shown in panel D is indicated  
495 (top). At the bottom, control experiments demonstrating the Fus3- and dose-dependency  
496 of the fluorescent signal by the reporter.

497 D – On the left, fluorescence signal for the four doses of  $\alpha$ -factor upon alanine-scanning of 49  
498 non-sector mutants, highlighting gain-of-function (GOF) mutants and loss-of-function  
499 (LOF) mutants in black and orange, respectively. On the right, fluorescence signal for the  
500 four doses of  $\alpha$ -factor upon alanine-scanning of 49 blue sector mutants, again  
501 highlighting GOF and LOF mutants in black and orange, respectively. Phenotypic  
502 mutants are highlighted by a darker background for the non-sector screen (yellow  
503 background) and the blue-sector screen (blue background).

504 E – Statistical significance for the enrichment in phenotypic mutants when mutating sector sites  
505 as compared to non-sector sites.

506 F – At the top, regulatory defects in the allosteric regulator Ste5, as illustrated for the case of a  
507 non-docking mutant, lead to more graded mating dose-responses as quantified by the  
508 percentage of “shmooing” cells. In the middle, non-sector GOF mutants display mating  
509 dose-responses that are comparable to wild-type. At the bottom, in contrast to GOF non-  
510 sector mutants, two out of the three GOF blue sector mutants display more graded  
511 mating dose-responses phenocopying the effects observed for non-docking Ste5.

512 G – Depiction of “shmooing” cells for the Fus3<sup>R58A</sup> and Fus3<sup>N70A</sup> in conditions that do not elicit  
513 “shmooing” in wild-type cells.

514

515 **Figure 5. Private sector sites encode subfamily-specific functions.**

516 A – Scatterplot including all pairs of kinase groups comparing their overall kinase domain

517 similarity, as measured by overall BLOSUM distance<sup>28</sup>, in the X axis to degree of overlap

518 in their sectors in the Y axis (see Methods). Between the AGC and CMGC subgroups,

519 the residues that define the sectors show limited overlap, despite a moderately high

520 degree of overall similarity between the kinase domain sequences of AGC and CMGC

521 family members.

522 B – Sector memberships of the eight sites that are part of a sector in the kinome-wide SCA

523 and in the AGC-specific CCA but not in CMGC-specific CCA. These sites are predicted to

524 drive the functional divergence between AGC and CMGC kinases. The amino acid

525 numbering shown corresponds to these sites in the representative structure used to map

526 all CCA models, namely ERK2 (PDB: 4QTE) as described in the methods section.

527 C – Left: Functional assay for Pkc1 where the MLP1-driven downstream transcriptional reporter

528 is activated upon the addition of zymolyase and the subsequent cell wall lysis.

529 Right: Functional assay for Hog1 where the HOR2-driven downstream transcriptional

530 reporter is triggered by hyperosmotic stress resulting from the addition of sorbitol.

531 D – Reporter signal for Pkc1 (top panel) and Hog1 mutants upon mutating the eight AGC-

532 specific private sector sites in both kinases. Analog-sensitive Pkc1 (“AS”) in combination

533 with the analog-specific inhibitor 1NM-PP1 (marked with +\*) and Hog1 deletion (hog1Δ)

534 were used as positive controls for the two assays respectively. A mutant in the aspartate

535 of the DFG motif forming the red sector of Hog1 was used as point mutant control to

536 confirm the Hog1 assay sensitivity to loss-of-function mutants of Hog1. Similarly as in

537 Figure 4D, phenotypic mutants are highlighted by a darker background for Pkc1 screen

538 (darker brown background). No phenotypic mutant was found for any of the eight Hog1

539 mutants (yellow background).

540 E – Protein expression and cellular localization of wild-type Pkc1, Pkc1<sup>G910A</sup> and Pkc1<sup>G986A</sup> as  
541 assayed by western blot and microscopy.

542 F – Fisher's test results assessing the enrichment of phenotypic mutations in Pkc1, as  
543 compared to Hog1, upon mutation AGC-specific sector positions (data from Fig.5E).

544

545 **Figure 6. The hierarchical organization of the kinase domain is targeted by somatic**  
546 **cancer mutations and allosteric inhibitors.**

547 A – General model of the kinase domain as a highly heterogeneous multi-functional domain with  
548 sets of residues encoding distinct molecular functions and being constrained by different  
549 selective pressures and evolutionary speeds leading to differential conservation and  
550 effects upon mutation.

551 B – Violin plots displaying the distribution of the percentage of residues belonging to the red,  
552 green, blue and non-sector sites that are mutated in cancer, using data from the COSMIC  
553 repository<sup>29</sup>. Each data point represents a specific protein kinase, for which the  
554 percentage of residues in each sector that contain one or more cancer mutations was  
555 calculated.  $p = 5.0E-4$ ;  $6.3E-7$ ;  $2.5E-4$ .

556 C – Twenty-seven unique cancer somatic mutations perturbing red sector residues in B-Raf  
557 (PDB: 4MBJ).

558 D – Thirty unique cancer somatic mutations perturbing red sector residues in EGFR (PDB:  
559 2GS2).

560 E – Tyrosine kinase (TK) blue sector residues contact the allosteric inhibitor Asciminib in the co-  
561 crystal structure of the Abl:inhibitor complex (PDB: 5MO4).

562

563 **SUPPLEMENTAL MATERIALS**

564 **5 Supplementary figures**

565 **Figure S1.** Comparative Coupling Analysis (CCA) computational results

566 **Figure S2.** Description of the red sector and correlation between residue conservation  
567 and sector membership

568 **Figure S3.** The green sector in the context of PKA in complex with PKI

569 **Figure S4.** Blue sector residues in the context of CDK2 and its interaction with cyclin A

570 **Figure S5.** Sequence divergence of AGC and CMGC

571 **5 Supplementary tables**

572 **Table S1.** Number of kinases for the fifteen species and the seven well-established  
573 kinase groups used for our CCA models.

574 **Table S2.** Residues belonging to the different sectors in each of the seven  
575 representative kinases (and structures) used to describe each kinase group.

576 **Table S3.** Unique somatic cancer mutations mapped to the different human protein  
577 kinases with information regarding the sector membership of the site and corresponding  
578 mutation.

579 **Table S4.** Plasmids used in this study.

580 **Table S5.** Yeast strains used in this study.



581 **SUPPLEMENTAL FIGURE LEGENDS**

582 **Figure S1. Comparative Coupling Analysis (CCA) computational results**

583 A- For each kinase group, at the top we show the coupling matrix resulting from calculating  
584 pair-wise residue coupling, extraction of significant eigenmodes and independent  
585 components and identification of protein sectors (as described in the methods section)  
586 from each group-specific alignment. In the middle, we represent the percentage of  
587 residues that are coupled and within those, the percentage that constitute each sector  
588 and independent component. At the bottom, a structural representation displaying the  
589 sectors within each kinase group is shown using canonical representative structures.

590 B- The CCA results from all kinase groups are compared by mapping them back to the  
591 largest and most complete structure from all the representatives (ERK2, PDB: 4QTE)<sup>30</sup>.  
592 Positions are colored according to their independent component and sector membership  
593 in each kinase group. To facilitate interpretation and visualization of the results, we re-  
594 order residues based on their sector membership, prioritizing first those residues for  
595 which residue membership to red, green or blue sectors is most conserved amongst  
596 different kinase groups.

597 C- Description of the size of the red, green and blue sector for the different kinase groups  
598 as a three-dimensional scatterplot as well as with the corresponding three two-  
599 dimensional scatterplots.

600 D- Phylogenetic dendrograms considering only residues that form the red, green or blue  
601 sector residues as well as those residues not belonging to any sector. In this case, the  
602 CMGC alignment was used to generate the different dendrograms.

603

604 **Figure S2. Description of the red sector and correlation between residue conservation**  
605 **and sector membership.**

- 606 A- Enumeration of the residues forming the red sector including their residue number in  
607 ERK2 (using numbering from PDB structure 4QTE) in the X axis and structural  
608 components that they are part of in the Y axis.
- 609 B- Scatterplots between residue conservation on the Y axis and residue contribution to the  
610 first independent component  $IC_A$ . reproduced from Fig 2B, for comparison with panels B-  
611 F. Residues forming the red sector are colored red.
- 612 C- Scatterplots between residue conservation on the Y axis and residue contribution to the  
613 second independent component  $IC_B$ . Residues forming the green sector are colored  
614 green.
- 615 D- Scatterplots between residue conservation on the Y axis and residue contribution to the  
616 third independent component  $IC_C$ . Residues forming the green sector are colored green.
- 617 E- Scatterplots between residue conservation on the Y axis and residue contribution to the  
618 fourth independent component  $IC_D$ . Residues forming the green sector are colored  
619 green.
- 620 F- Scatterplots between residue conservation on the Y axis and residue contribution to the  
621 fifth independent component  $IC_E$ . Residues forming the blue sector are colored blue.

622

623 **Figure S3. The green sector in the context of PKA in complex with PKI.**

- 624 A- Illustration of residues forming the green sector residues, superimposed on the structure  
625 of PKA in complex with PKI as a peptide inhibitor (PDB: 1ATP)<sup>31</sup>.
- 626 B- Quantification of the surface burial of red, green and blue sector residues by the peptide  
627 ligand., Solvent exposure in the presence and absence of the peptide was calculated  
628 using UCSF Chimera<sup>32</sup>.

629

630 **Figure S4. Blue sector residues in the context of CDK2 and its interaction with cyclin A.**

- 631 A- Illustration of residues forming the blue sector residues, superimposed on the structure  
632 of CDK2 in complex with cyclin-A (PDB: 1ATP)<sup>31</sup>.
- 633 B- Quantification of the surface burial of red, green and blue sector residues by the  
634 regulatory subunit, by calculating solvent exposure with UCSF Chimera<sup>32</sup> in the  
635 presence and absence of cyclin-A (PDB: 1FIN).

636

637 **Figure S5. Sequence divergence of AGC and CMGC.**

- 638 A- Scatterplot from Figure 5A, annotated to indicate all pairs of kinase groups comparing  
639 their overall kinase domain similarity, as measured by overall BLOSUM distance<sup>28</sup>, in the  
640 X axis to degree of overlap in their sectors in the Y axis (see Methods). For  
641 completeness all kinase group pairs are labelled.
- 642 B- Scatterplot of sequence variations of residues that form the fourth and fifth independent  
643 components ( $IC_D$  and  $IC_E$ ) for all human protein kinases, compared to each other (see  
644 Methods). Kinases are colored by their kinase group. Note the large divergence  
645 between ACG (green) and CMGC (yellow) kinases.

646

647 **METHODS**

648 **Statistical Coupling Analysis (SCA)**

649 To perform SCA, we constructed an alignment including the kinase domain for protein kinases  
650 of all groups (kinome-wide alignment). Briefly, following alignment processing as detailed in  
651 previous work<sup>11,12</sup>, we used the python-based software package (pySCA) to compute a four-  
652 dimensional array with conservation-weighted covariance between all possible pairs of positions  
653 in the alignment and every possible amino acid residue within this pair of positions. By taking  
654 the magnitude (Frobenius norm) of the vector for all the amino-acids for a given pair of  
655 positions, this four-dimensional array was subsequently compressed into a two-dimensional  
656 coupling matrix, where the value at every position represents the degree of coupling between  
657 every pair of positions in the domain. Significantly coupled residues are identified by spectral  
658 decomposition and comparison to a randomized alignment, where residues within a kinase  
659 position are reshuffled thereby maintaining conservation while losing coupling. Next,  
660 independent component analysis (ICA) allows the identification of “independent components”  
661 (ICs) or clusters of residues that are more coupled amongst themselves than with the other  
662 residues. Positions contributing to each IC is defined by fitting an empirical statistical to the ICs  
663 and selecting positions above a defined default cutoff (>95% of the CDF). For further analysis of  
664 these independent components, by using singular value decomposition (SVD) as described in  
665 the next section, we can evaluate which specific protein sequences and domain positions  
666 contribute the most to a specific independent component<sup>12</sup>. Finally, as discussed elsewhere<sup>12</sup>, in  
667 cases where significant coupling still exist between several “independent components”, they are  
668 considered as part of the same protein sector.

669

670

671 **Singular Value Decomposition (SVD) and mapping of sequence variations along**  
672 **independent components.**

673 While a more complete theoretical description of Singular Value Decomposition (SVD) in the  
674 context of SCA can be found elsewhere<sup>12</sup>, here we provide a shorter description. Briefly, SVD  
675 allows to link coevolving groups of amino acid residues (such as those forming an independent  
676 component, IC, or protein sector) to patterns of sequence divergence in the original alignment.  
677 As such, using SVD we can map each protein in the original alignment as a function of its  
678 sequence divergence to every other protein in the alignment. Even more, by restricting the  
679 mapping to specific ICs the obtained mapping reflects the sequence relationship of each protein  
680 to every other protein specifically as it relates to the amino acid residues forming that IC.

681

### 682 **Comparative Coupling Analysis (CCA)**

683 Taking advantage of the seven standard kinase groups as classified on the basis of function,  
684 sequence and structural similarity, evolutionary history and broad substrate specificity (AGC,  
685 CAMK, CMGC, STE, CK1, TKL and TK)<sup>2</sup>, we constructed group-specific alignments by  
686 restricting each alignment to protein kinases belonging to that group. In order to allow the  
687 comparison between groups and with the kinome-wide alignment, the alignments were  
688 constructed with Mafft (with its parameters --add and --keeplength)<sup>33</sup> using as baseline an  
689 original alignment including all human eukaryotic protein kinases. A canonical representative  
690 structure for each group was chosen based on completeness of the structure solved and  
691 optimizing for the largest number of residues within the kinase domain being covered. The  
692 canonical representative structures used were PKCtheta for AGC (PDB: 2JED), Pim1 for CAMK  
693 (PDB: 4JX3)<sup>34</sup>, TTBK1 for CK1 (PDB: 4BTJ)<sup>35</sup>, ERK2 for CMGC (PDB: 4QTE)<sup>36</sup>, MST2 for STE  
694 (PDB: 4LGD)<sup>37</sup>, BRaf for TKL (PDB: 4MBJ)<sup>38</sup> and Abl for TK (PDB: 1FPU)<sup>39</sup>. Using each  
695 canonical representative structure and following the steps described in the SCA section above,  
696 we calculated coupling matrices for each kinase group separately. Once coupling matrices were  
697 calculated for the different kinase groups, they were mapped back to the representative  
698 structure that covered the largest number of residues within the kinase domain, namely ERK2

699 (PDB: 4QTE)<sup>36</sup>. By cross-comparing with the sectors identified in the kinome-wide analysis and  
700 other groups, we predicted in silico functional similarities and differences between the kinase  
701 groups. Finally, we quantified the degree to which a residue predicted to be of one sector in one  
702 kinase group tended to encode the same sector in other kinase groups and used the median  
703 number of groups encoding the same sector as a general measure of compositional  
704 conservation.

705

### 706 **Estimation of negative selection (Omega estimates)**

707 Using the YN00 program that is part of the PAMLX package<sup>40</sup> with default parameters we  
708 estimated the number of synonymous and nonsynonymous substitutions for the different  
709 residues to be considered, while correcting for multiple substitutions, transition/transversion rate  
710 biases and base/codon frequency biases<sup>13</sup>. These omega estimates are a measure of the  
711 amount of negative or positive selection that a specific protein or protein segment has gone  
712 through, with distributions around 1.0 indicating similar degrees of positive and negative  
713 selection and distributions below 1.0 indicating stronger negative selection). For our purposes,  
714 after obtaining cDNA for all CMGC kinases from KinBase ([kinase.com/kinbase](http://kinase.com/kinbase)), we constructed  
715 a cDNA alignment from the CMGC-specific alignment, allowing us to map back the sector sites  
716 that each codon corresponds to for a large number of sites, and computed omega estimates for  
717 the three different sectors as well as for non-sector sites.

718

### 719 **Residue conservation**

720 The conservation of amino acid residues independently of other positions is here measured by  
721 the Kullback-Leibler relative entropy,  $D_i$ . This measure compares the observed amino acid  
722 residue at a position to the background frequency of this amino acid from a non-redundant  
723 database of protein sequences.

724

725 **Calculation of area covered by substrate peptide or kinase regulator in kinase structures**

726 The solvent exposure of every residue in the kinase domain is calculated using the UCSF  
727 Chimera package<sup>32</sup> in the presence and absence of the substrate peptide or kinase regulator.  
728 In-house python scripts subsequently compare the solvent exposure calculated for both  
729 situations and calculate the area that is buried by the peptide or regulator in residues that form  
730 the red, green or blue sectors.

731

732 **Measuring similarity between kinase groups**

733 Pairwise kinase group similarity was measured by calculating residue-normalized BLOSUM  
734 distances for every residue within the kinase domain as described elsewhere<sup>17</sup>. The coupling  
735 difference between two kinase groups is calculated by measuring the LogWorth,  $-\log_{10}(p\text{-value})$ , where the p-value is calculated from a hypergeometric test comparing the number of  
736 shared sector sites given the size of the sectors in both groups. As a result from these  
737 calculations, higher LogWorth values correspond to higher coupling similarity between kinase  
738 groups. After identifying AGC-CMGC as the pair of kinase most divergent in their coupling given  
739 their kinase similarity, their divergence is further inspected using SVD and other standard  
740 methods previously described<sup>11,12</sup>.

742

743 **Mapping of somatic cancer mutations**

744 Genomic coordinates (human genome version GRCh38.p7) for missense cancer somatic point-  
745 mutations were retrieved from COSMIC v79<sup>29</sup>, and they were mapped to ENSEMBL canonical  
746 proteins, predicting the variants functional effect with the standalone perl script of the Ensembl  
747 Variant Effect Predictor, v87.18<sup>41</sup>. A total of 1,515,599 of cancer somatic mutations were  
748 mapped to a canonical protein. To obtain, for all protein kinases, the kinase domain residues  
749 perturbed by somatic cancer mutations, all the variants that mapped to the kinase domain were  
750 aggregated by kinase residues. Only ENSEMBL canonical proteins with a 100% identical

751 kinase domain sequence, with respect to the corresponding kinase domain sequence reported  
752 in KinBase, were considered further.

753 In order to define sectors for all protein kinases of all groups, using the kinome-wide alignment,  
754 the sector sites identified in the group representative kinases were mapped to the  
755 corresponding residues of all the other kinases within the groups. The kinase domain residues  
756 that in the kinome-wide alignment did not map to any residues of the corresponding group  
757 representatives, i.e. sequence insertions, due to the uncertainty in sector association, were  
758 excluded from the analysis. A total of 14,860 mutations were mapped to 13,152 sites within a  
759 kinase domain.

760 The mutation percentage was calculated across all kinases, for all sectors, as the number of  
761 residues perturbed by somatic cancer mutations, divided by the number of residues in the  
762 sector. Wilcoxon signed-rank tests were performed to assess the significance of the difference,  
763 across all kinases, between the mutation percentage in the red sector compared to the blue, the  
764 green and the non-sector. Definitions for OG and TSG were obtained from a work reviewing the  
765 functional role of the kinome in cancer<sup>4</sup>.

766

### 767 **Yeast strains and plasmids**

768 Yeast strains and plasmids used in this work are described in Supplementary Tables 2 and 3,  
769 respectively. All strains are in the W303 genetic background. Gene deletions were performed  
770 by one-step PCR as described<sup>42</sup>. All mutants were integrated into yeast genome as a single  
771 copy expressed from their endogenous promoter.

772

### 773 **Site-directed mutagenesis**

774 Site-directed mutagenesis was performed with QuickChange according to the manufacturer's  
775 directions (Agilent).

776



777 **Cell growth and treatment with  $\alpha$  factor**

778 All cells were grown in synthetic complete media with dextrose (SDC). Three single colonies  
779 from each strain bearing the AGA1pr-YFP reporter were inoculated in 1 ml SDC in 2 ml 96-well  
780 deep well plates and serially diluted 1:5 three times. Plates were incubated overnight at 30°C.  
781 In the morning cells from the row that had been diluted 1:25 were typically found to have OD<sub>600</sub>  
782 ~0.5. These cells were diluted 1:5 in 4 rows of a 96 well U-bottom micro-titer plate in a total  
783 volume of 180  $\mu$ l and incubated for 1 hour at 30°C. In each row, cells were treated with different  
784 concentrations of  $\alpha$  factor: 0, 0.01, 0.1 and 1  $\mu$ M (10x stocks of  $\alpha$  factor were prepared and 20  $\mu$ l  
785 were added to 180  $\mu$ l cells). Treated cells were incubated for 4 hours at 30°C before translation  
786 was stopped by addition of 50  $\mu$ g/ml cycloheximide. Cells were incubated for an additional hour  
787 at 30°C to allow time for fluorophores to mature.

788

789 **Flow cytometry**

790 The AGA1pr-YFP reporter was measured by flow cytometry by sampling 10  $\mu$ l of each sample  
791 using a BD LSRFortessa equipped with a 96-well plate high-throughput sampler. Data were left  
792 ungated and FlowJo was used to calculate median YFP fluorescence. Bar graphs show the  
793 average of the median of the three independent colonies that were assayed, and error bars are  
794 the standard deviation.

795

796 **Confocal microscopy**

797 96 well glass bottom plates were coated with 100  $\mu$ g/ml concanavalin A in water for 1 hour,  
798 washed three times with water and dried at room temperature. 80  $\mu$ l of cells that had been  
799 treated with pheromone at the indicated concentrations for 3 hours were diluted to OD<sub>600</sub> ~0.05  
800 and added to a coated well. Cells were allowed to settle and attach for 15 minutes, and  
801 unattached cells were removed and replaced with 80  $\mu$ l SDC media. Imaging was performed at  
802 the W.M Keck Microscopy Facility at the Whitehead Institute using a Nikon Ti microscope

803 equipped with a 100×, 1.49 NA objective lens, an Andor Revolution spinning disc confocal setup  
804 and an Andor EMCCD camera. Images were analyzed in ImageJ.

805

### 806 **Western blotting**

807 Total protein was TCA purified from cells as described. 10 µl of each sample was loaded into 4-  
808 15% gradient SDS-PAGE gels (Bio-Rad). Gels were run at 25 mA for 45 minutes, and blotted  
809 to PVDF membrane at 225 mA for 40 minutes. After 1hr blocking in Li-Cor blocking buffer,  
810 membranes were incubated with anti-FLAG primary antibody (SIGMA, F3165) and/or anti-PGK  
811 (22C5D8) overnight at 4°C on a platform rotator (all 1:1000 dilutions in blocking buffer).  
812 Membranes were washed three times with TBST and probed by anti-mouse or anti-rabbit IR  
813 dye-conjugated IgG (Li-Cor, 926-32352, 1:10000 dilution). The fluorescent signal was detected  
814 with the Li-Cor/Odyssey system.

815

# Figure 1

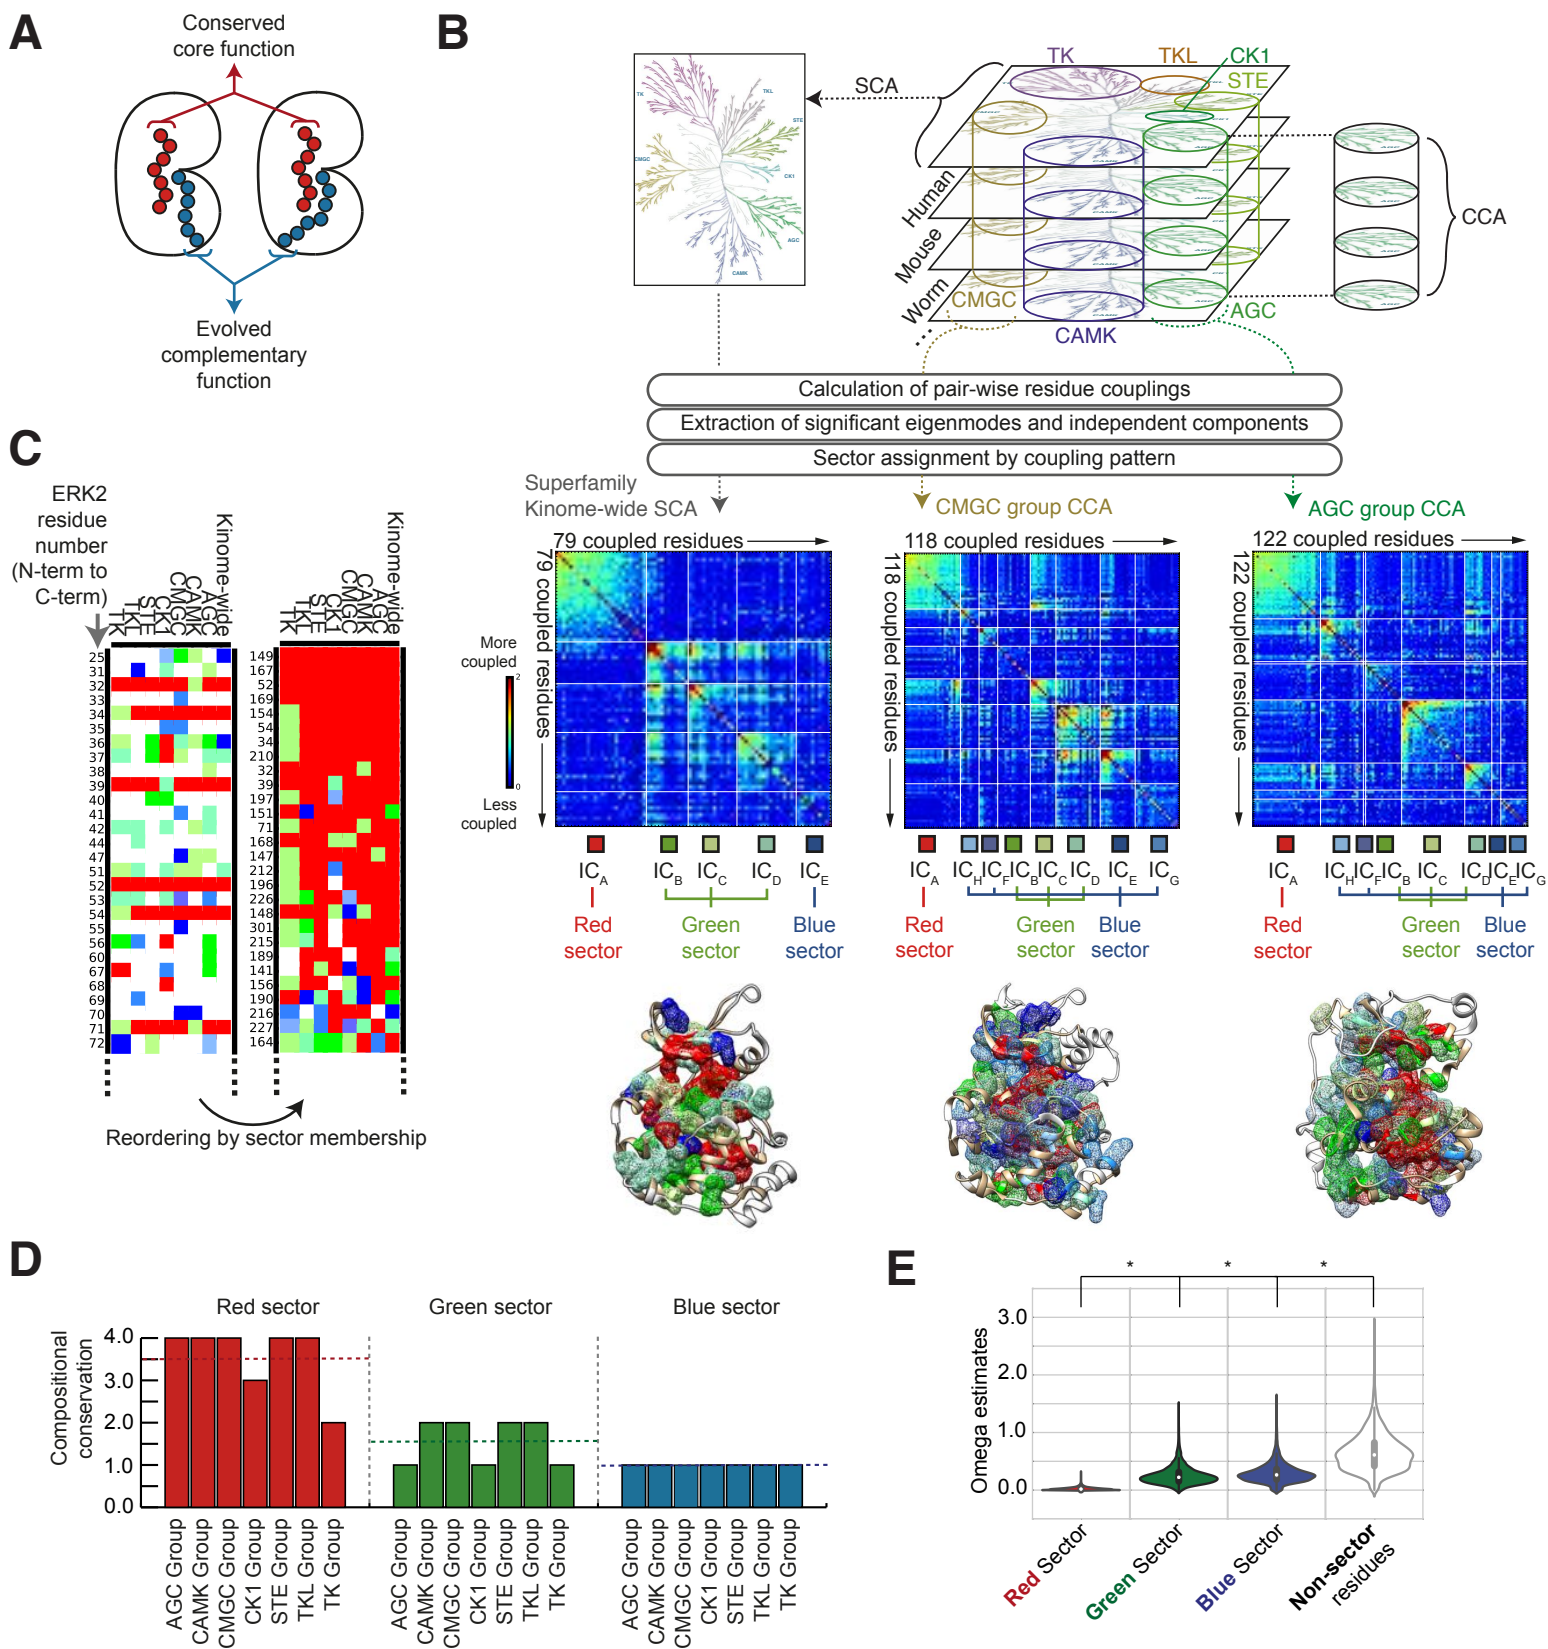

## Figure 2

**A**

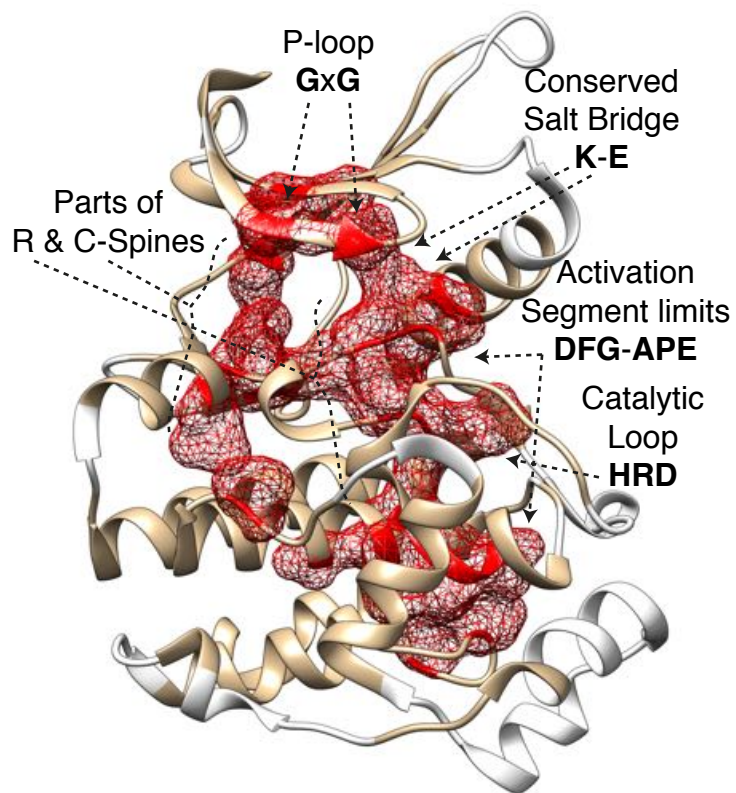

**B**

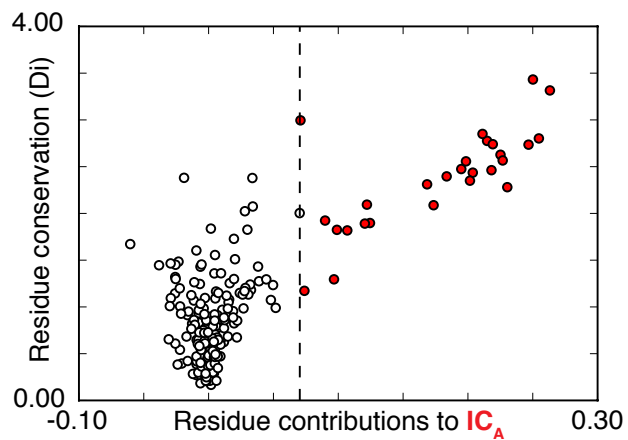

**C**

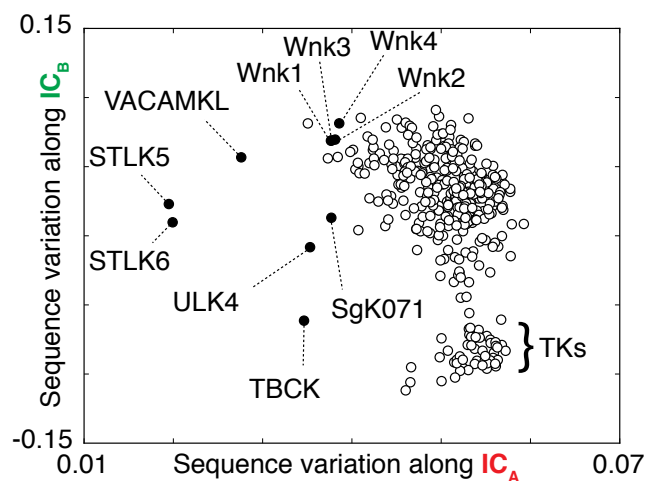

## Figure 3

**A**

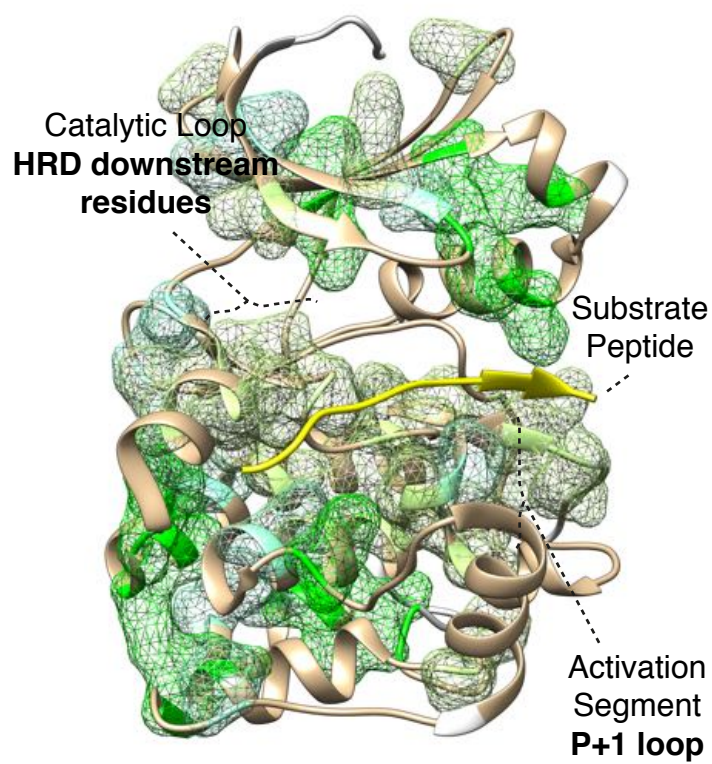

**C**

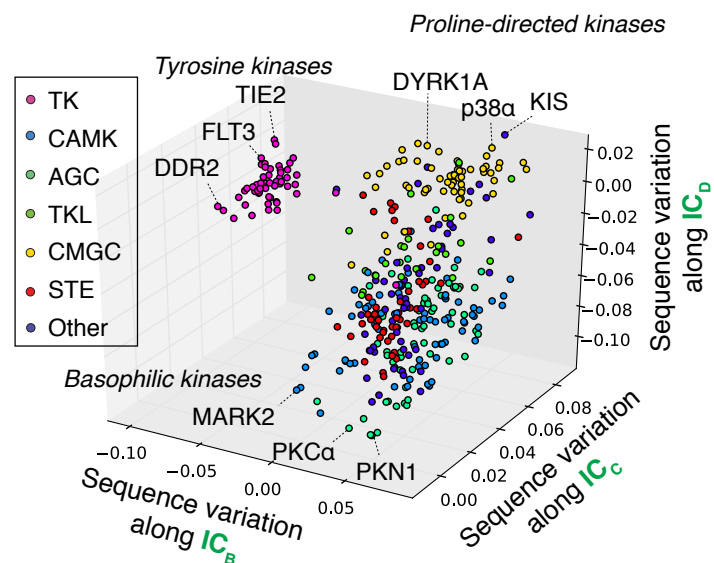

**B**

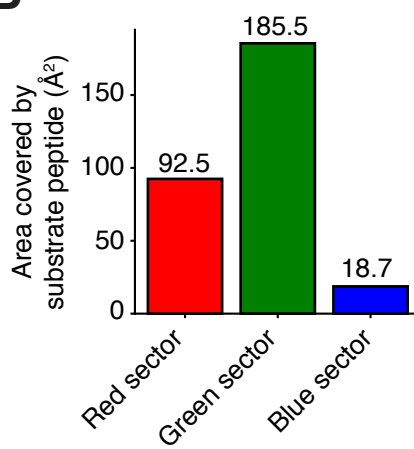

**D**

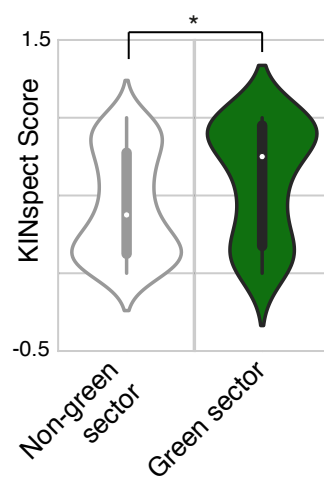

## Figure 4

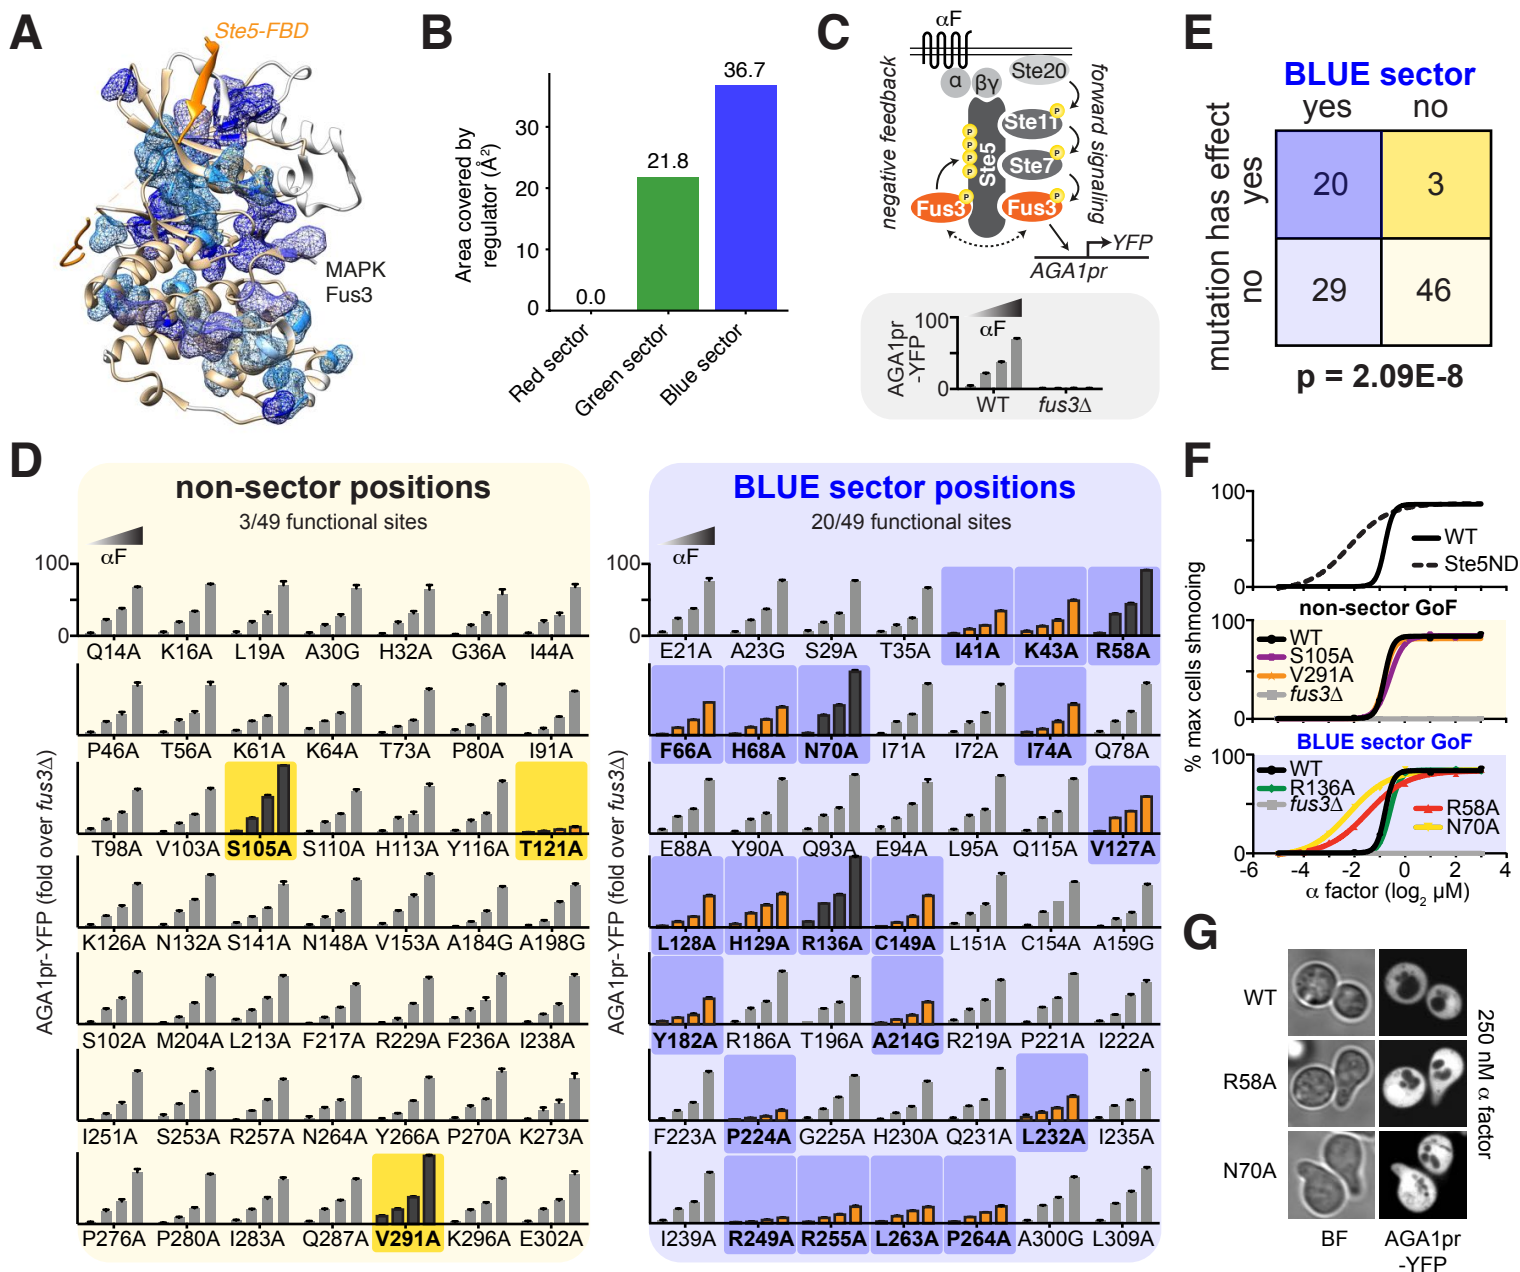

## Figure 5

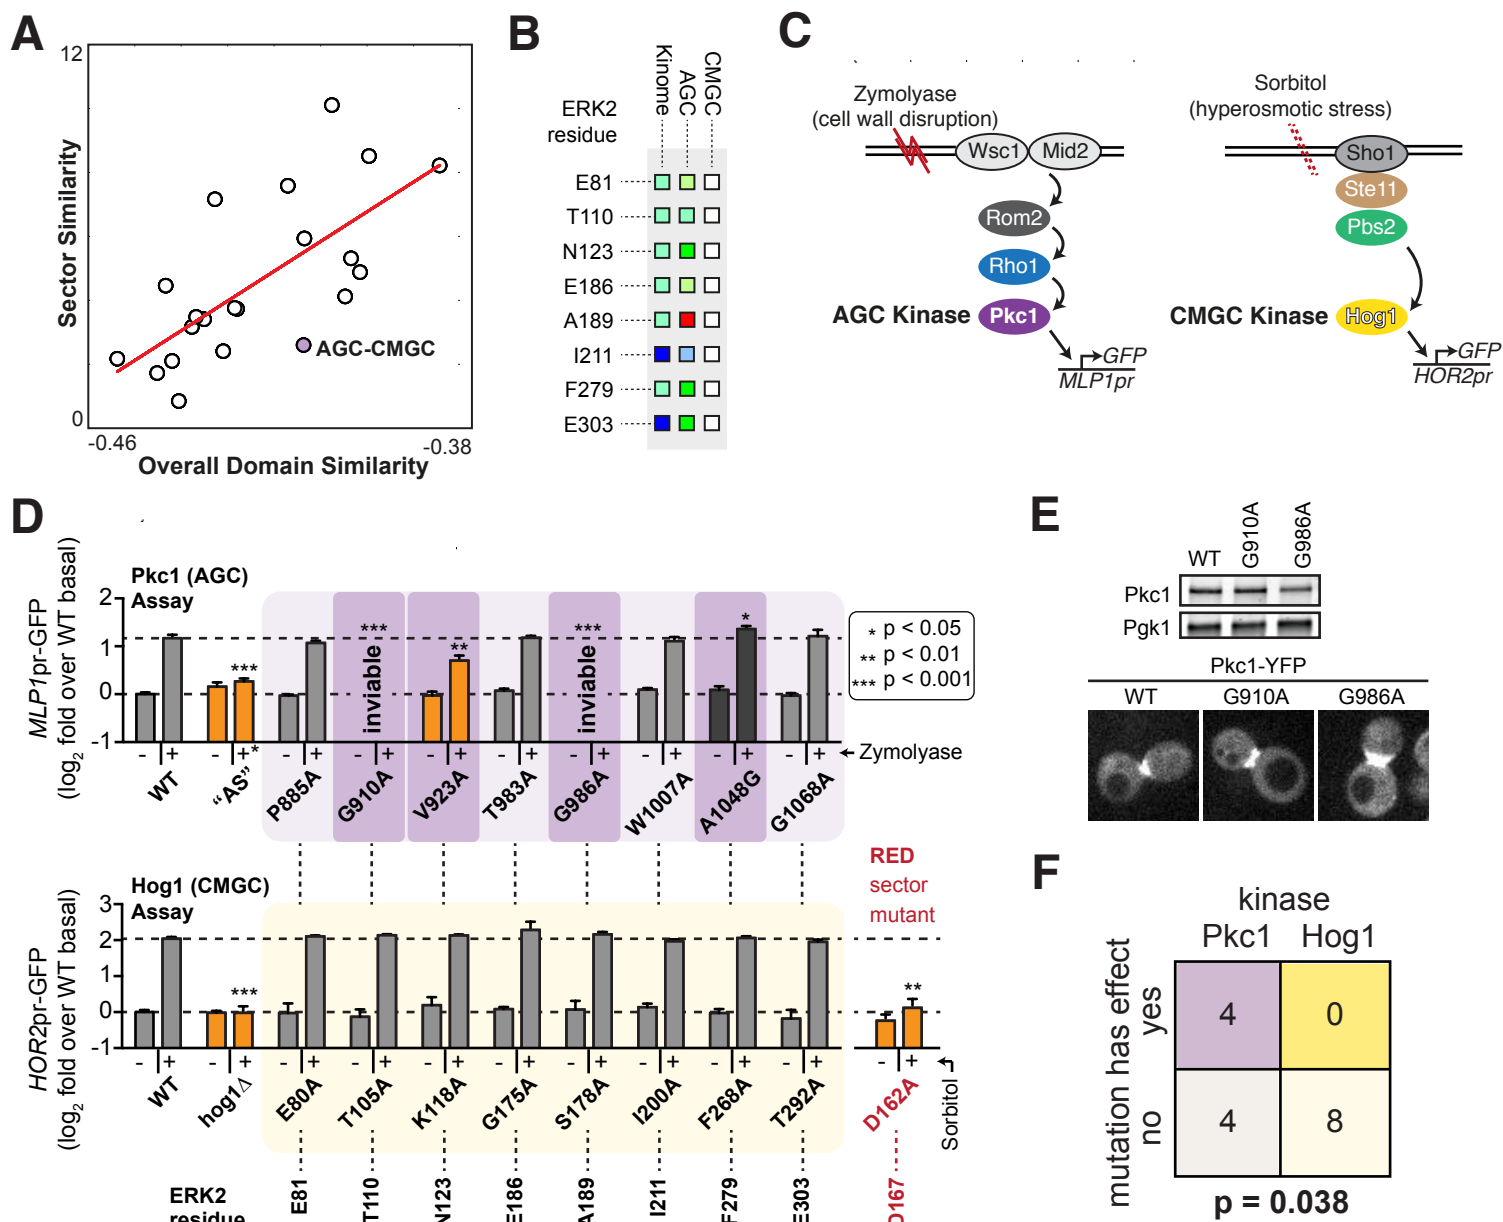

## Figure 6

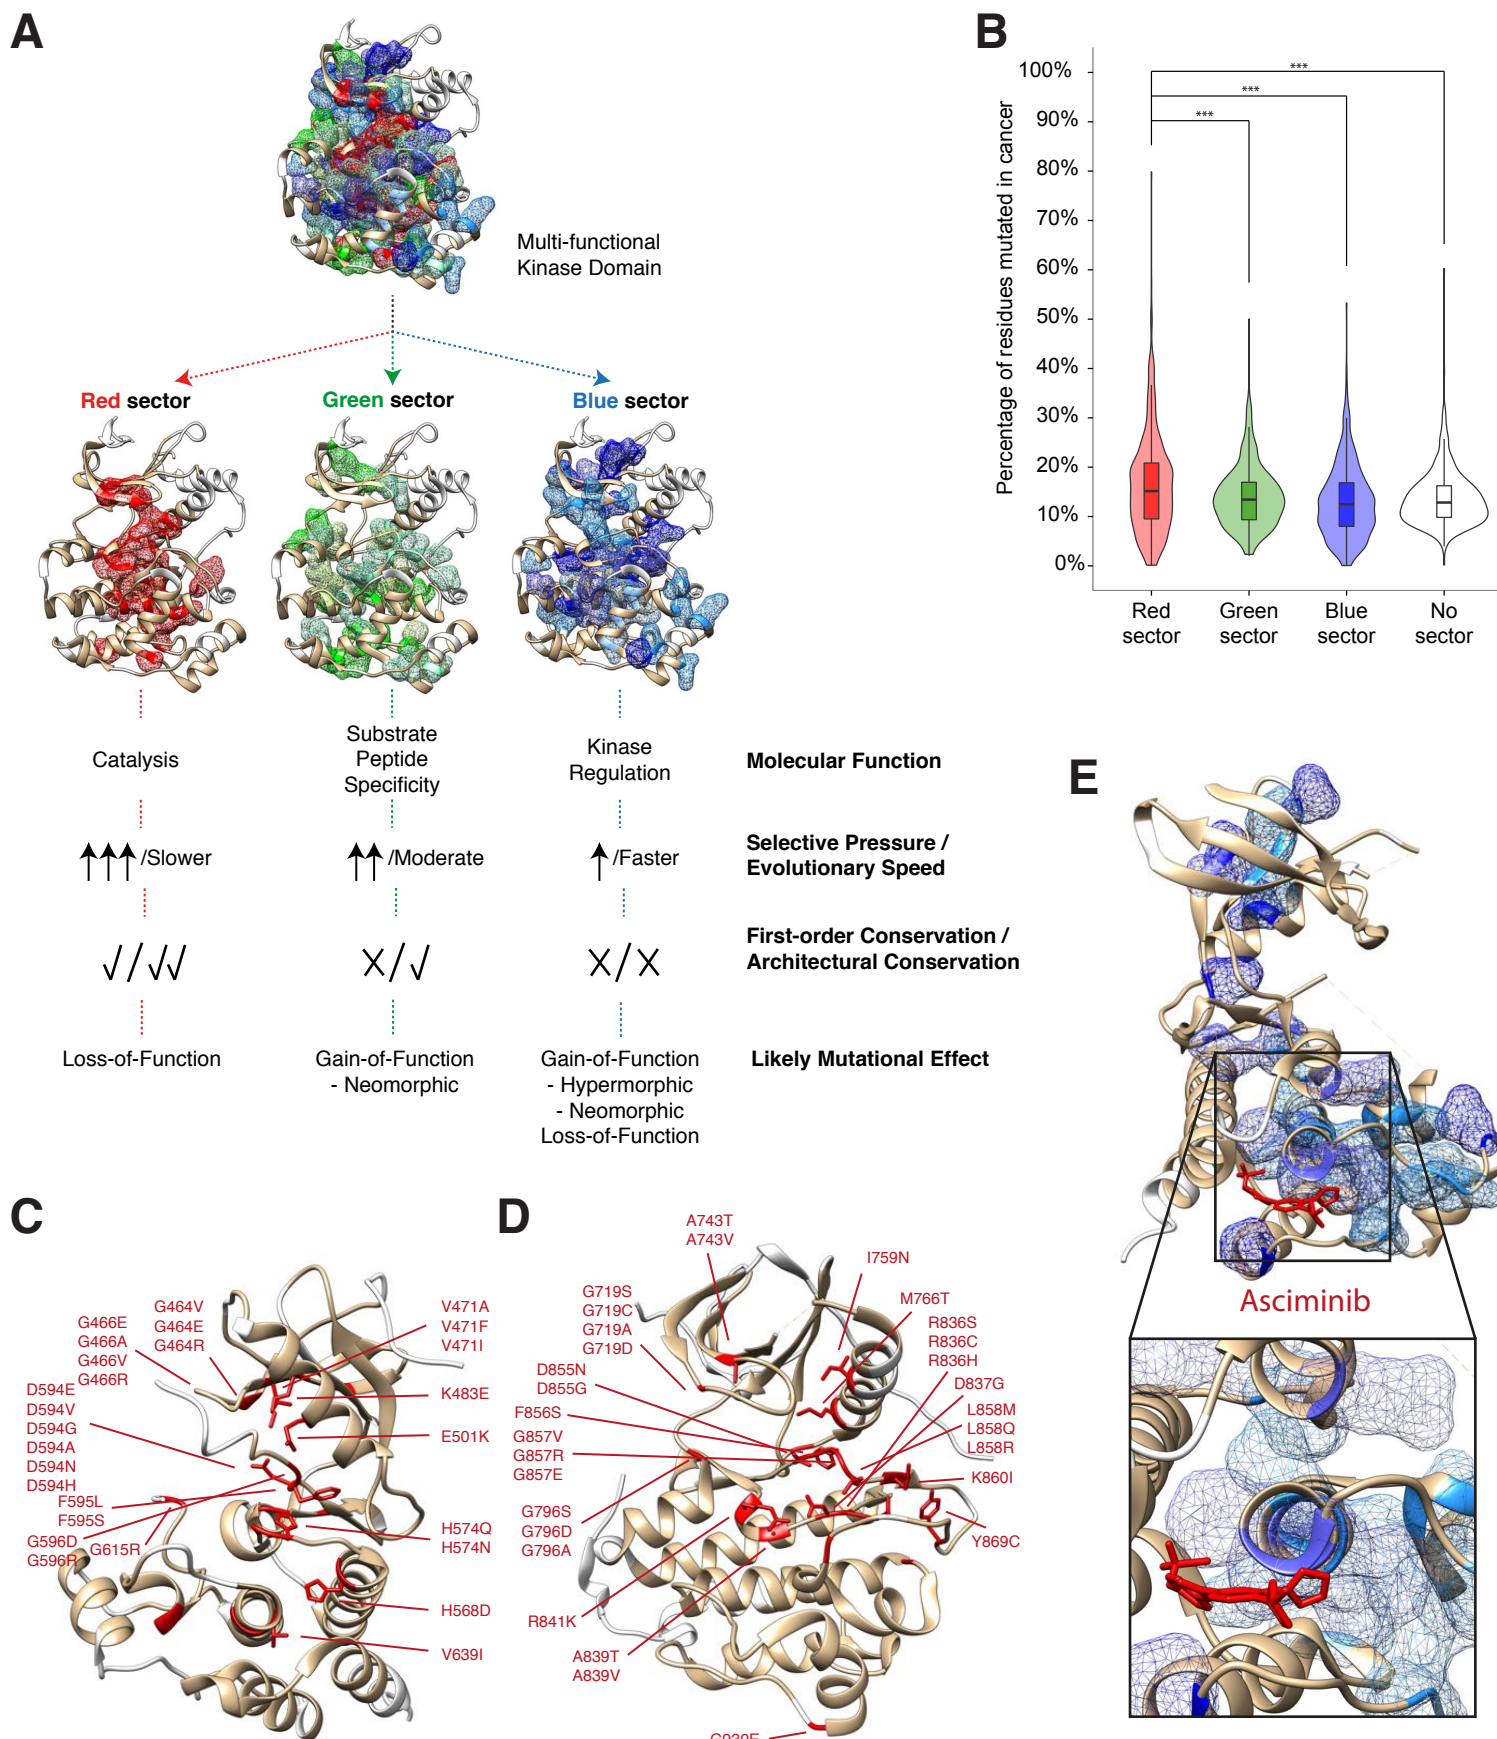



# Figure S1

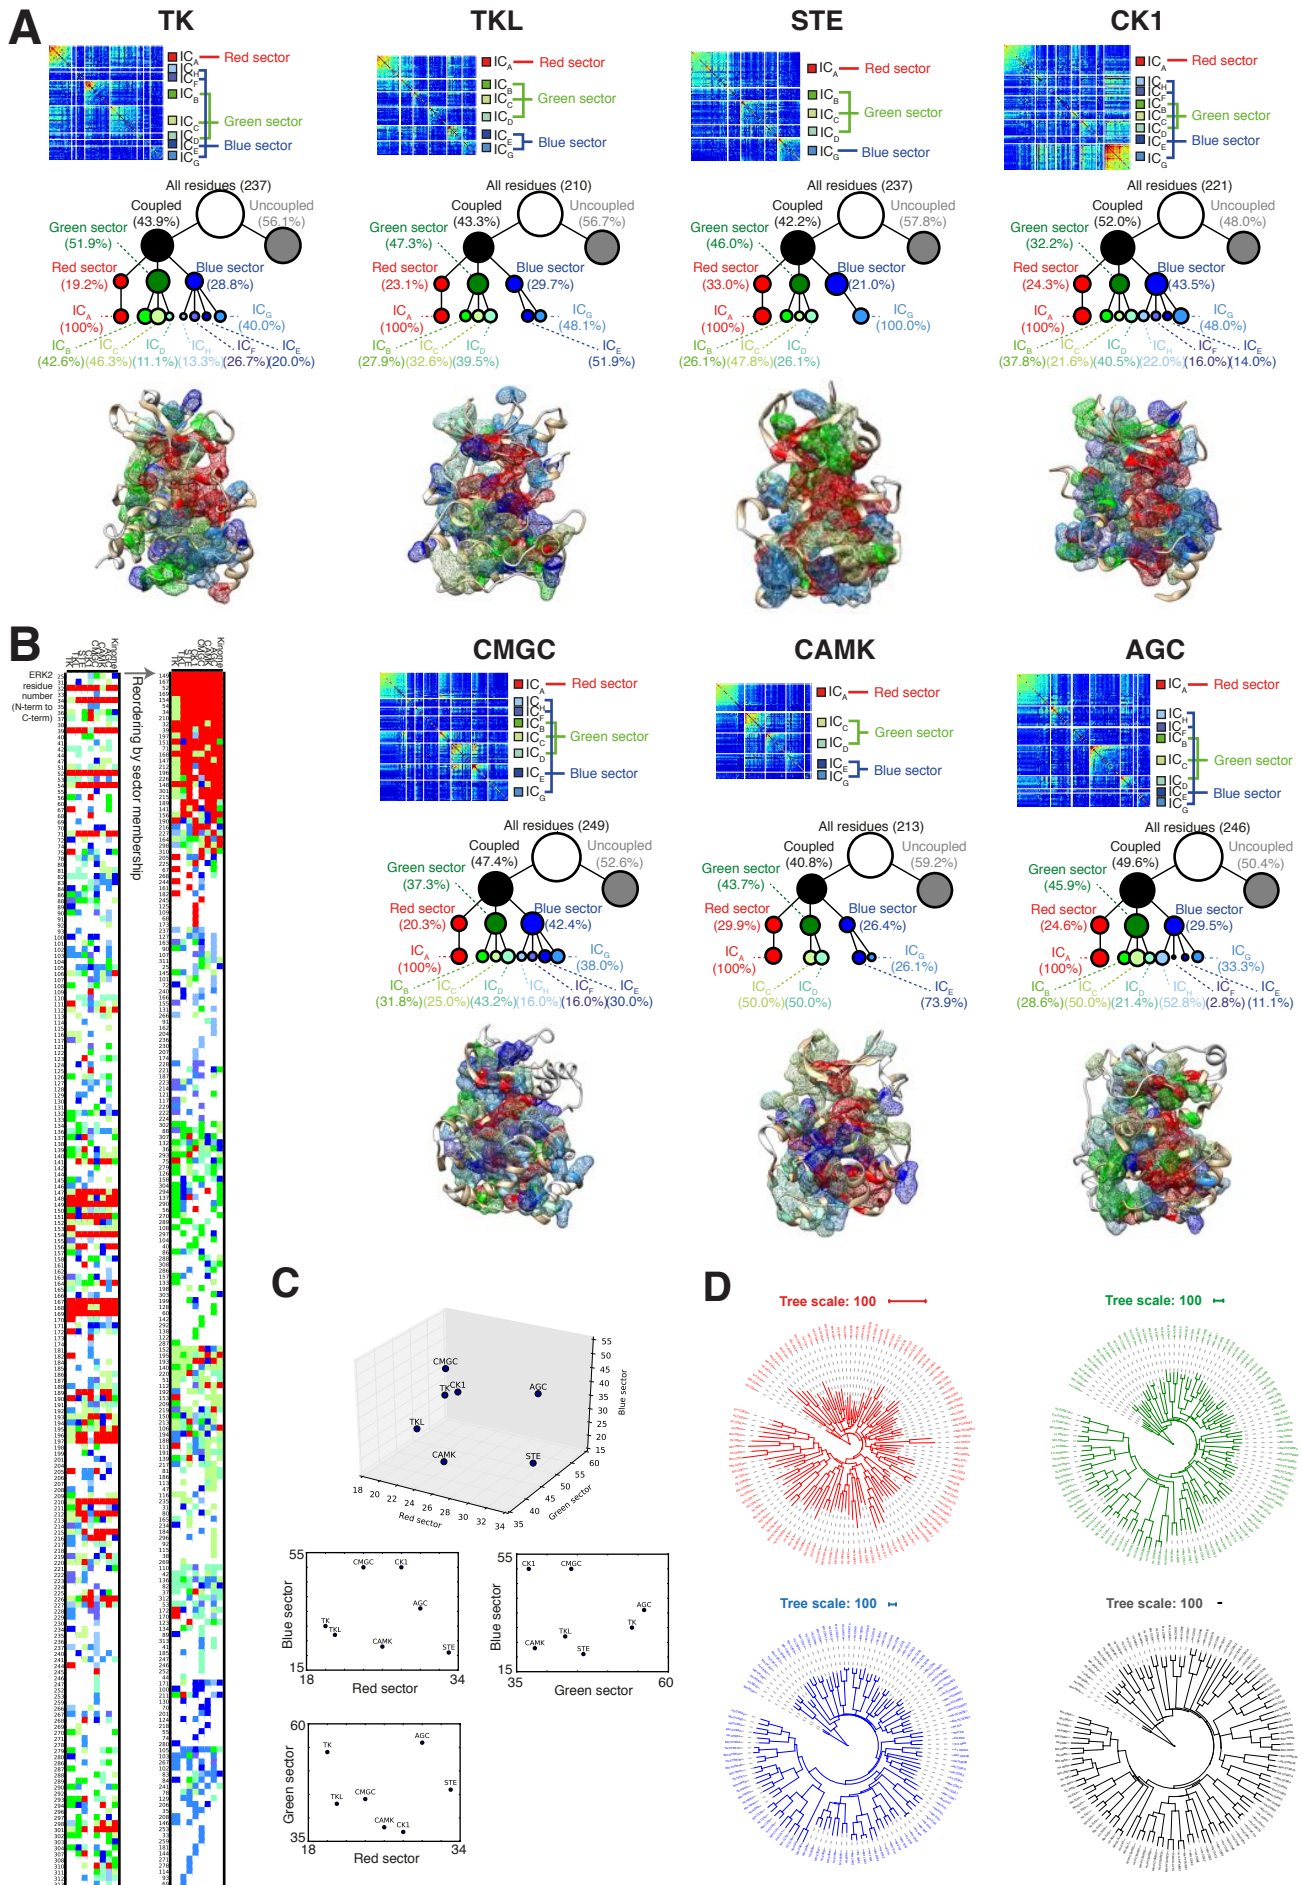

# Figure S2

**A**

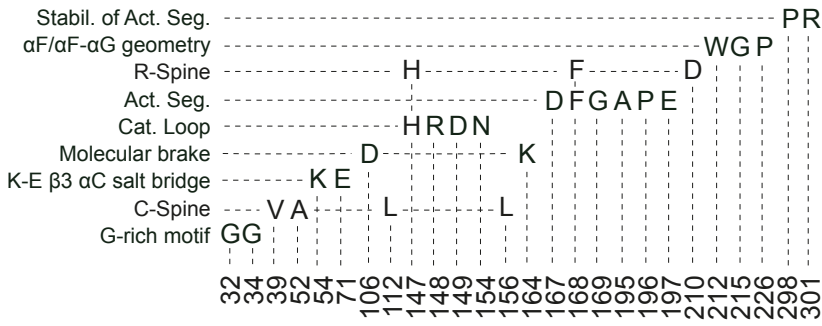

**B**

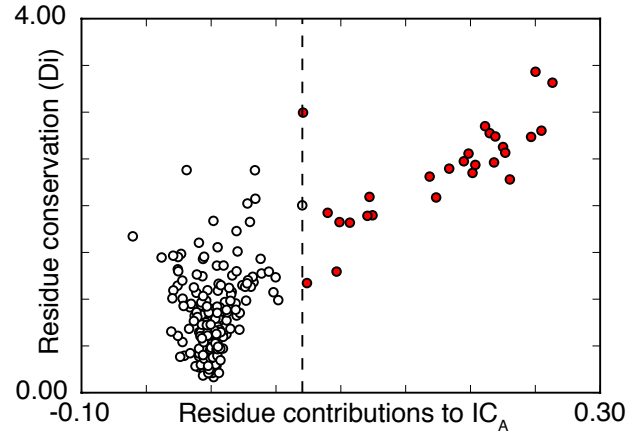

**C**

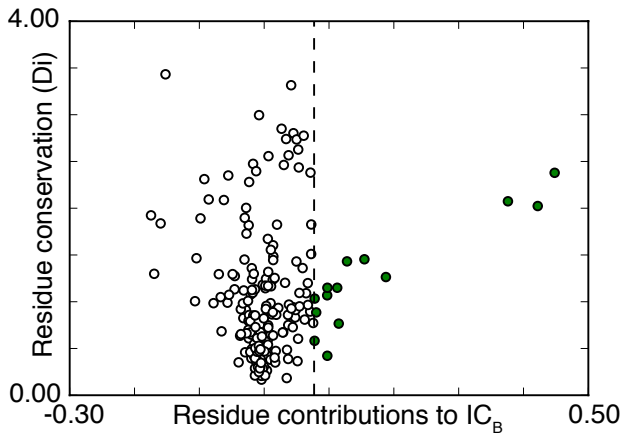

**D**

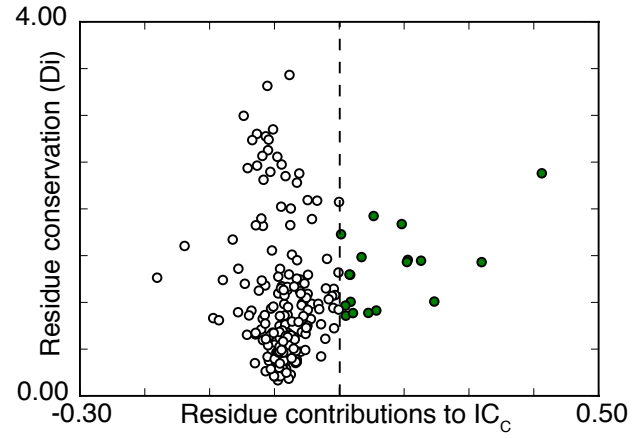

**E**

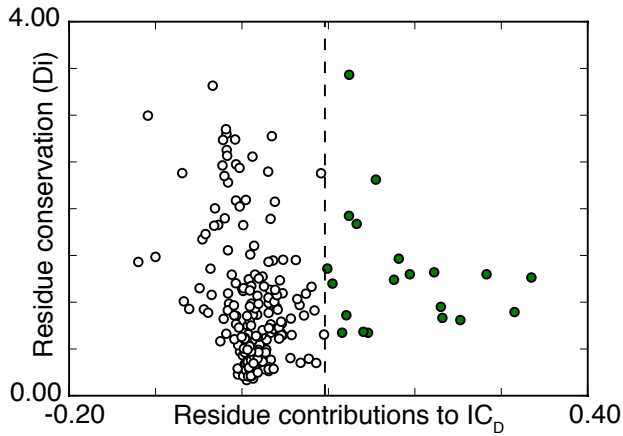

**F**

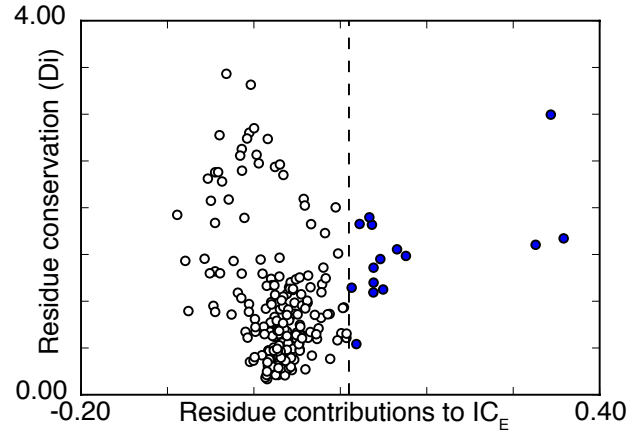

## Figure S3

**A**

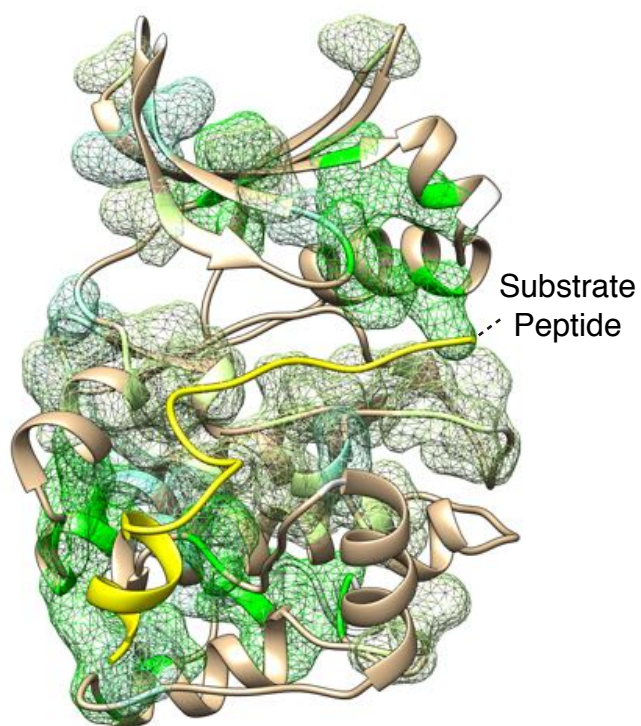

**B**

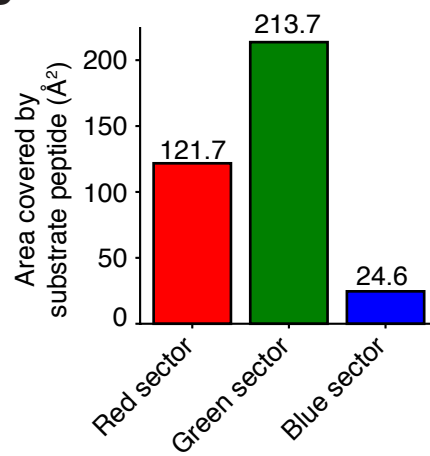

## Figure S4

**A**

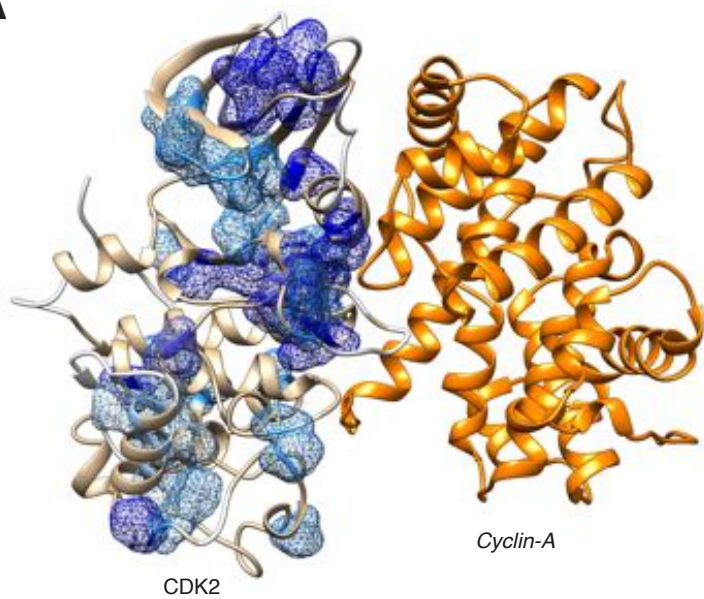

**B**

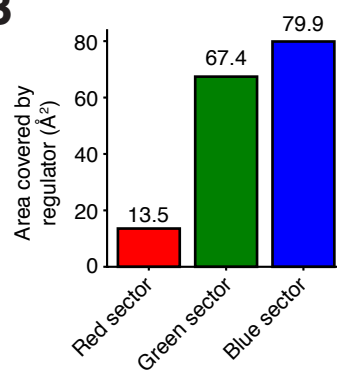

## Figure S5

**A**

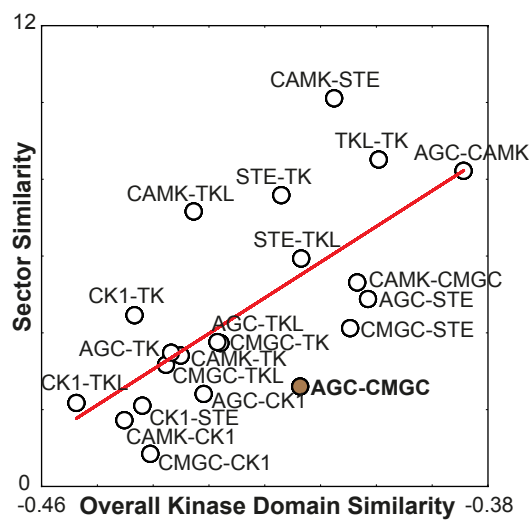

**B**

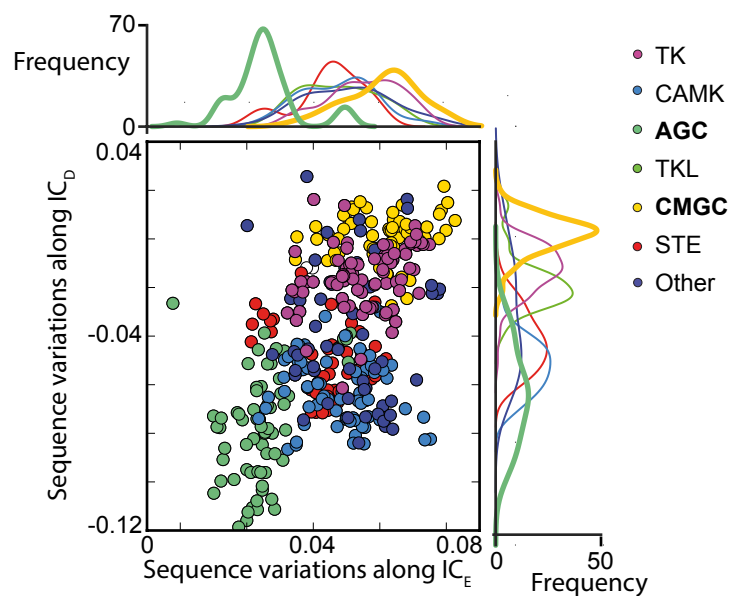

Source: https://www.biorxiv.org/content/10.1101/197491v1.full.pdf
